# Supplementary material
Source: PubMed Central journal article supplement (PMC7338221)
Supplement: EMS86707-supplement-Suppl_Figs_1_6_Suppl_tables_1_5.pdf [file EMS86707-supplement-Suppl_Figs_1_6_Suppl_tables_1_5.pdf]

# Supplementary Figure 1

**a**

| Tests performed at WTSI |                                                                                                                               |
|-------------------------|-------------------------------------------------------------------------------------------------------------------------------|
| Viability / Fertility   | Viability<br>Fertility<br>Recessive lethality                                                                                 |
| Anatomy                 | X-ray imaging<br>Dysmorphology<br>Hair dysmorphology<br>Hair Follicle Cycling<br>Heart weight                                 |
| Metabolism              | Body Composition (DEXA)<br>Indirect Calorimetry<br>Glucose Tolerance<br>Insulin                                               |
| Immune System           | Blood cytometric analysis<br>Salmonella challenge<br>Citrobacter challenge                                                    |
| Other                   | Modified Shirpa<br>Grip Strength<br>Erythrocyte Micronuclei<br>Auditory Brainstem Response<br>Plasma Chemistry<br>Haematology |

**b**

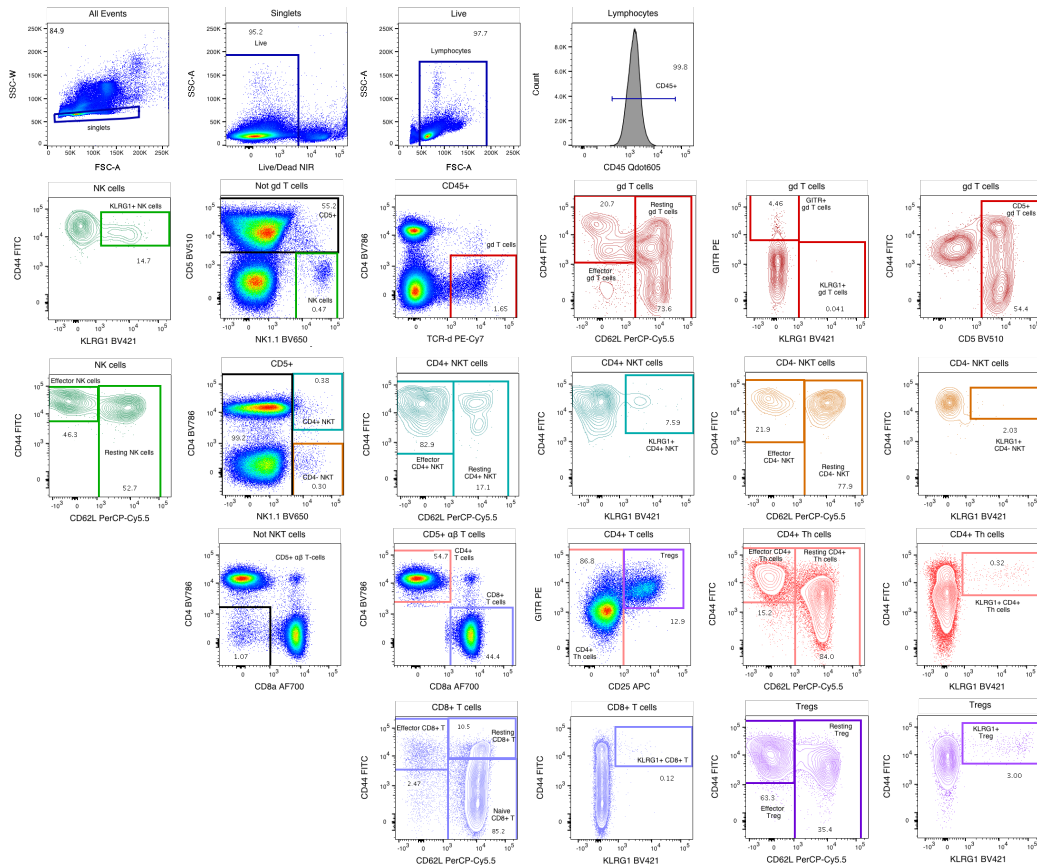

**c**

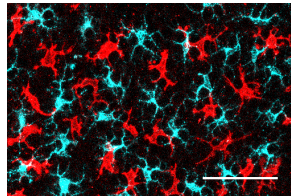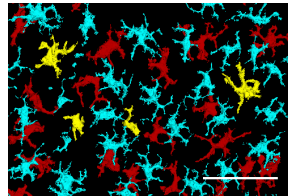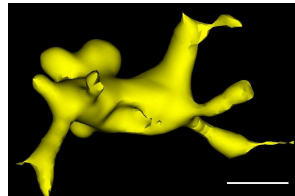

**d**

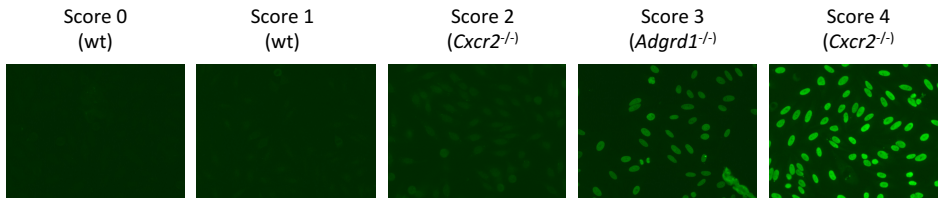

**e**

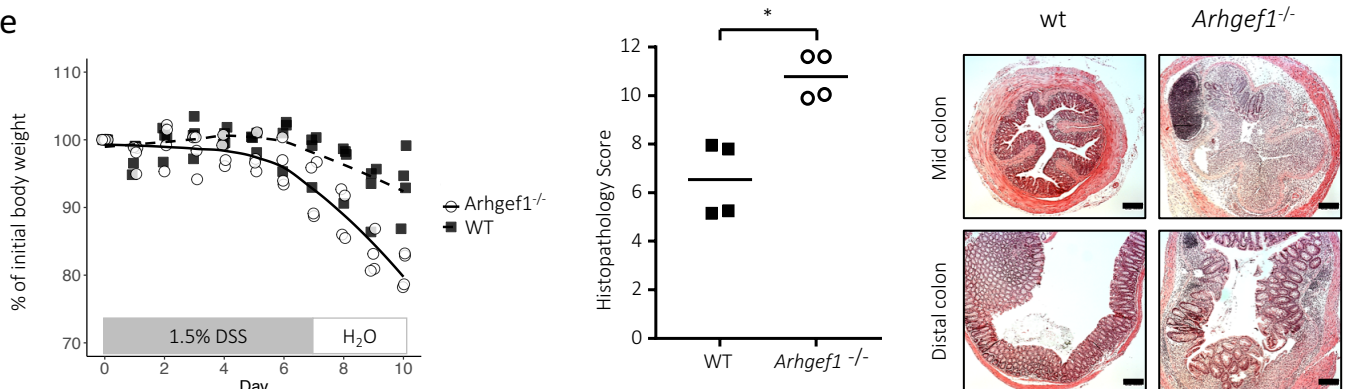

f

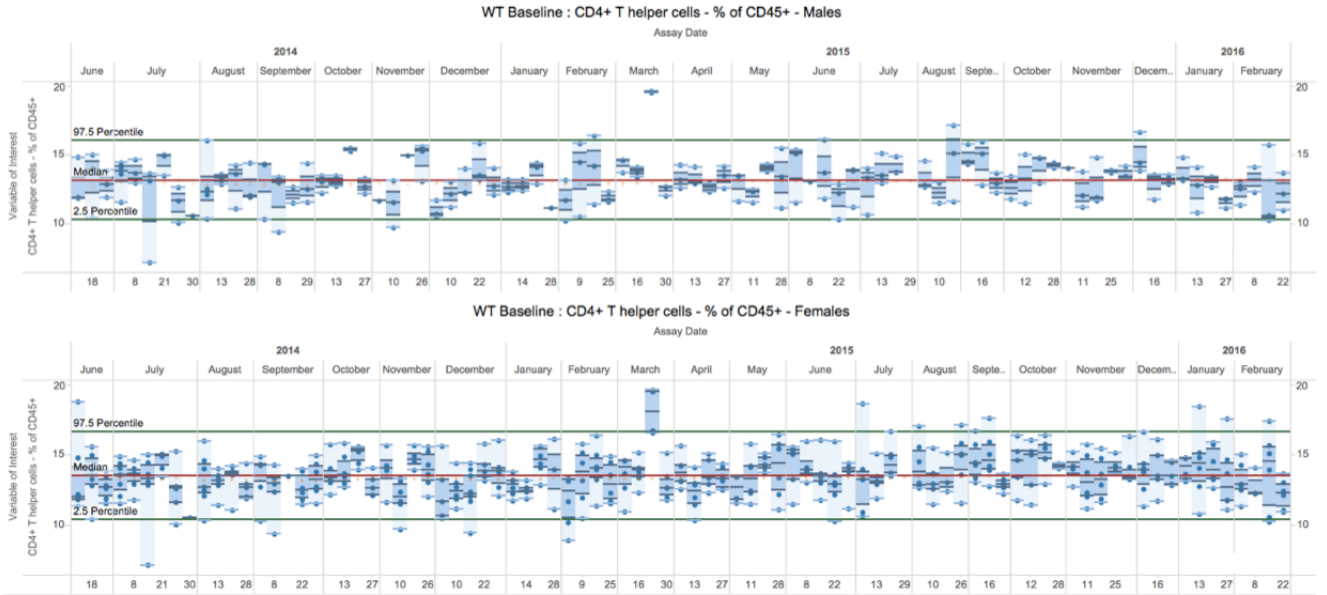

g

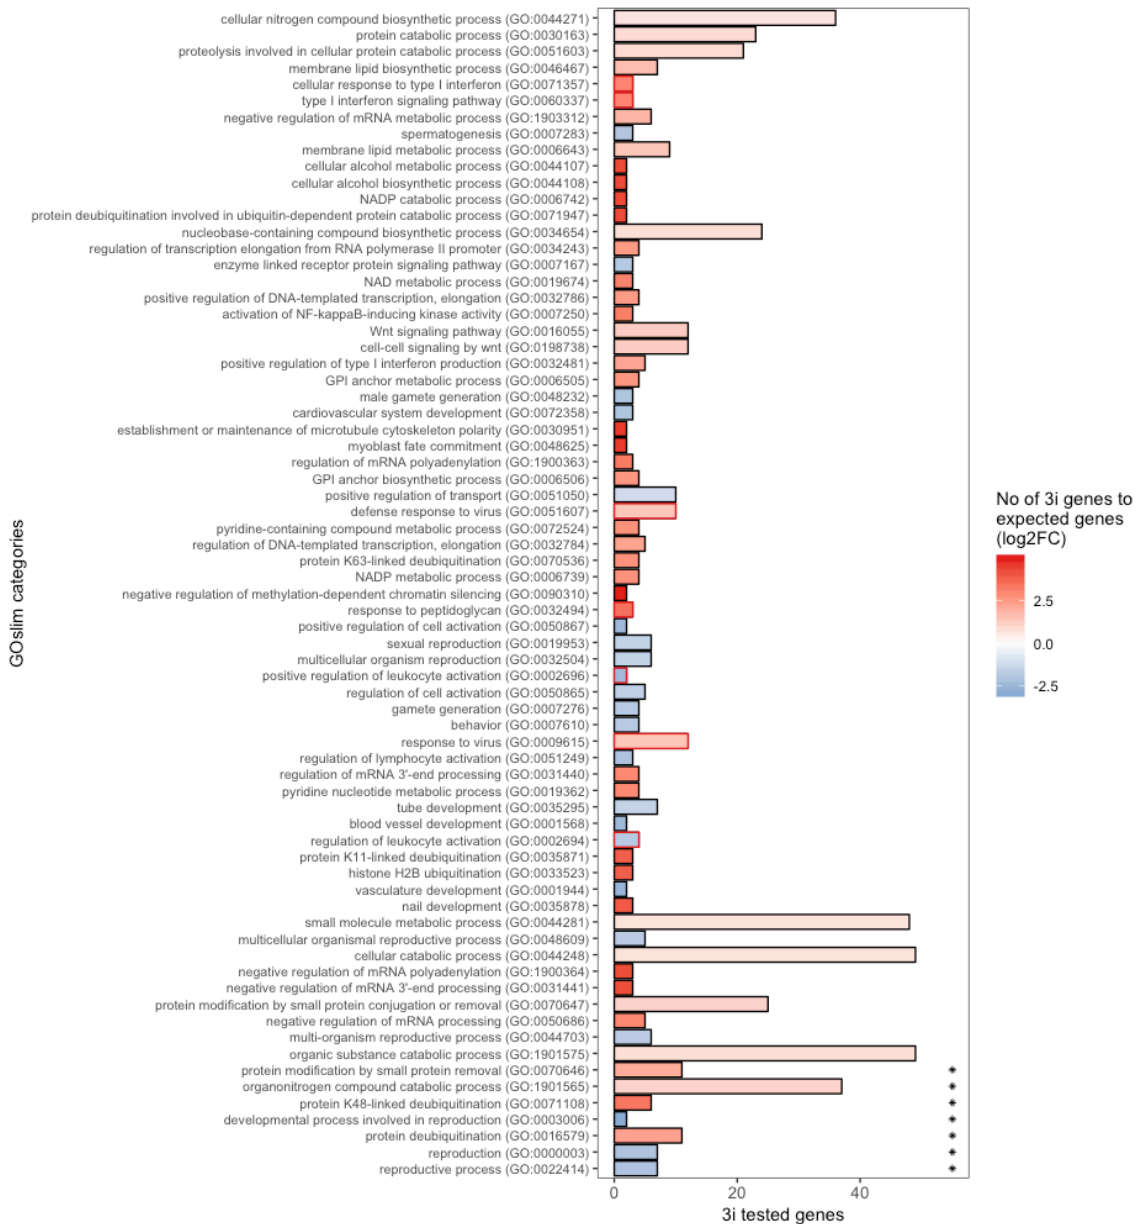

h

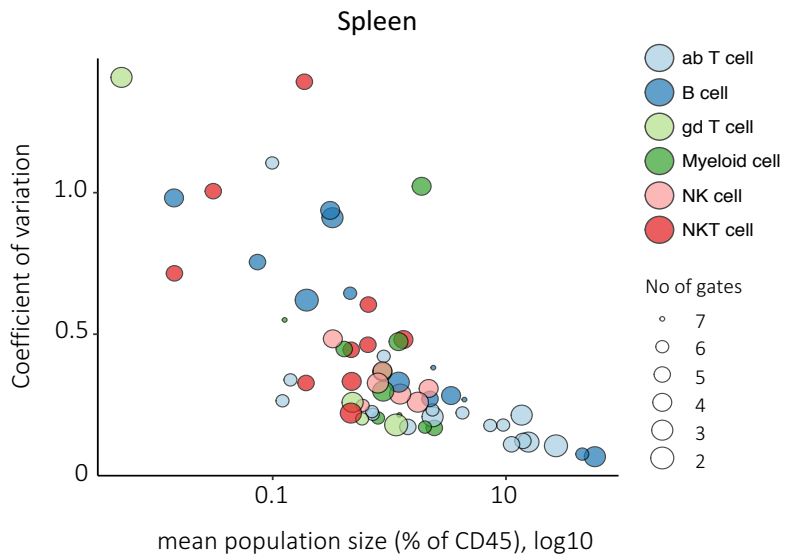

i

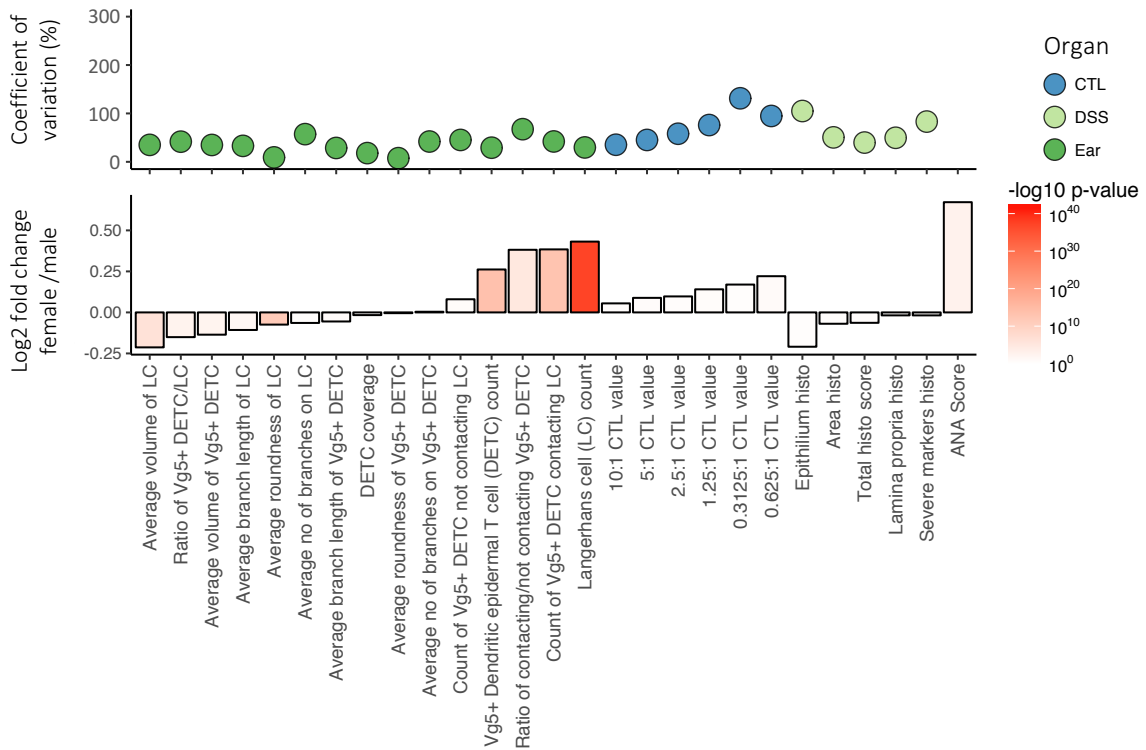

# Supplementary Figure 2

Females

## Pearson correlation between subsets

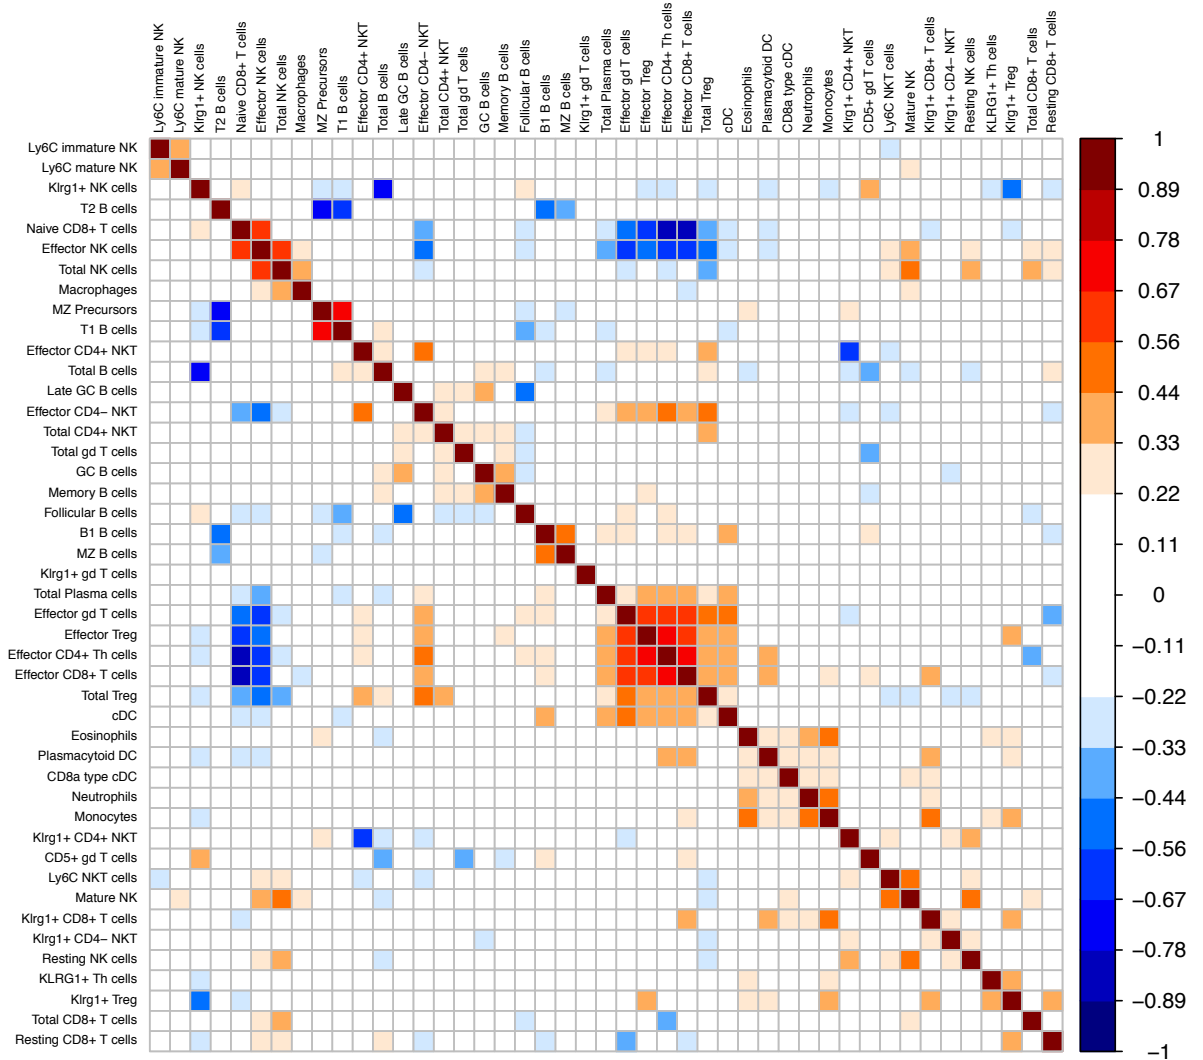

# Supplementary Figure 3

a Males

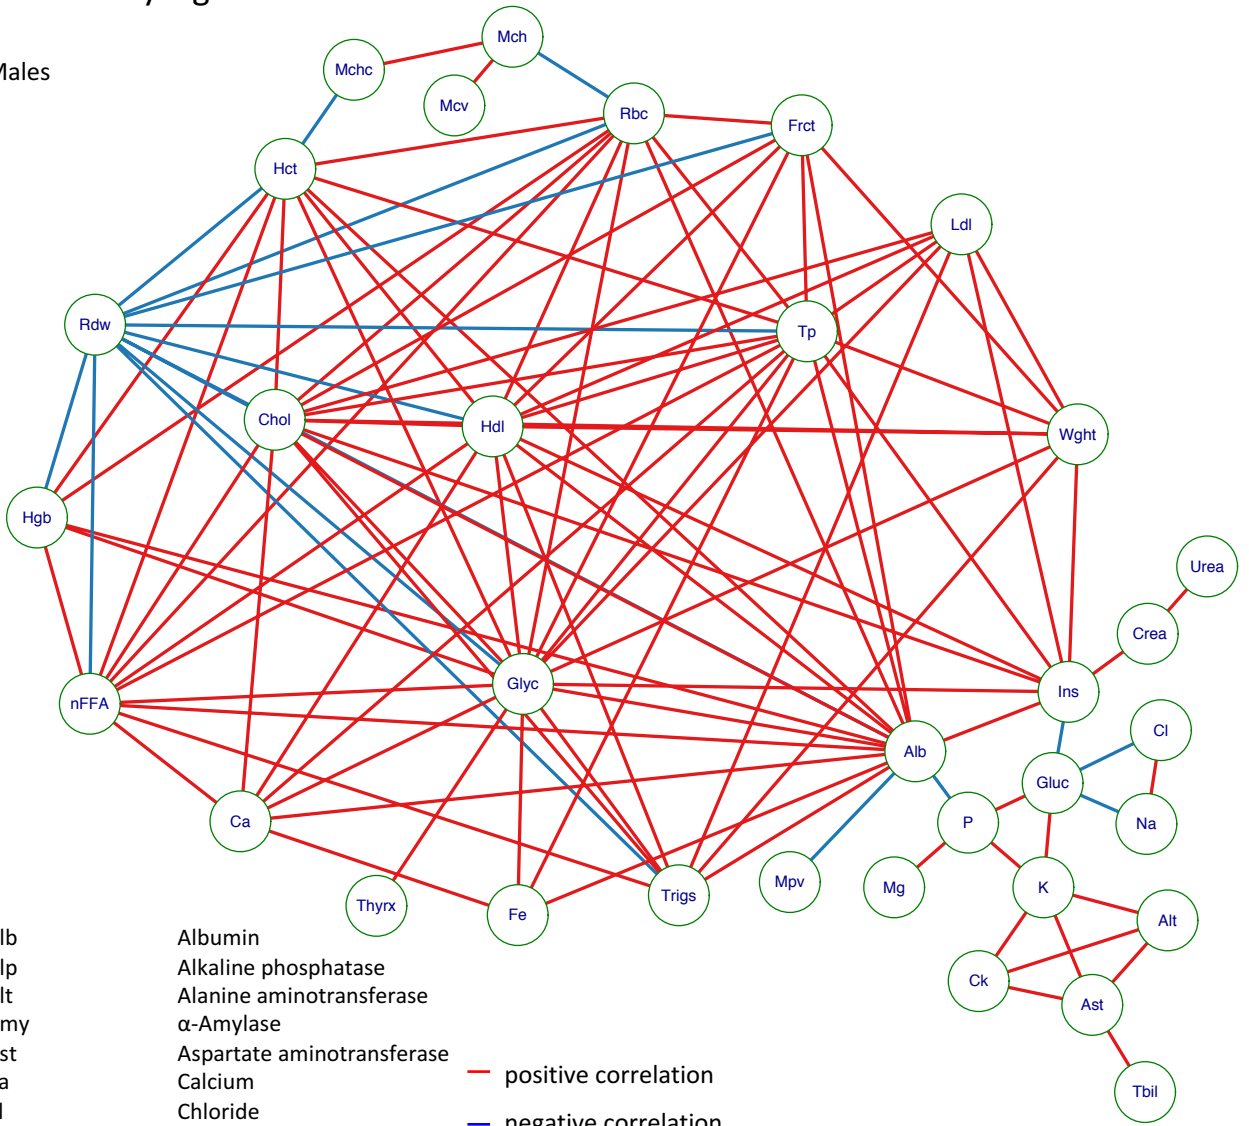

- |               |                             |
|---------------|-----------------------------|
| Alb           | Albumin                     |
| Alp           | Alkaline phosphatase        |
| Alt           | Alanine aminotransferase    |
| Amy           | α-Amylase                   |
| Ast           | Aspartate aminotransferase  |
| Ca            | Calcium                     |
| Cl            | Chloride                    |
| Chol          | Cholesterol                 |
| Ck            | Creatinine kinase           |
| Crea          | Creatinine                  |
| Fe            | Iron                        |
| Fruct         | Fructosamine                |
| Gluc          | Glucose                     |
| Glyc          | Glycerol                    |
| Hct           | Hematocrit                  |
| Hdl           | HDL cholesterol             |
| Hgb           | Hemoglobin                  |
| Ins           | Insulin                     |
| K             | Potassium                   |
| Ldl           | LDL cholesterol             |
| Mch           | Mean corpuscular hemoglobin |
| Mchc          | Mean cell hemoglobin        |
| concentration |                             |
| Mcv           | Mean corpuscular volume     |
| Mg            | Magnesium                   |
| Mpv           | Mean platelet volume        |
| Na            | Sodium                      |
| nFFA          | Free fatty acids            |
| P             | Phosphorus                  |
| Rbc           | Red blood cell count        |
| Rdw           | Red blood cell distribution |
| width         |                             |
| Tbil          | Total bilirubin             |
| Thyrx         | Thyroxine                   |
| Tp            | Total protein               |
| Trigs         | Triglycerides               |
| Urea          | Urea                        |

b Females

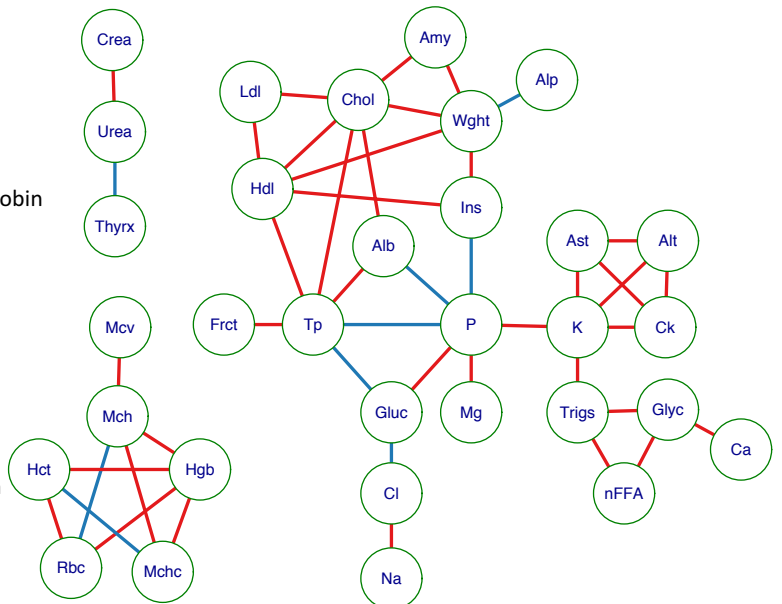

# Supplementary Figure 4

## a Blood

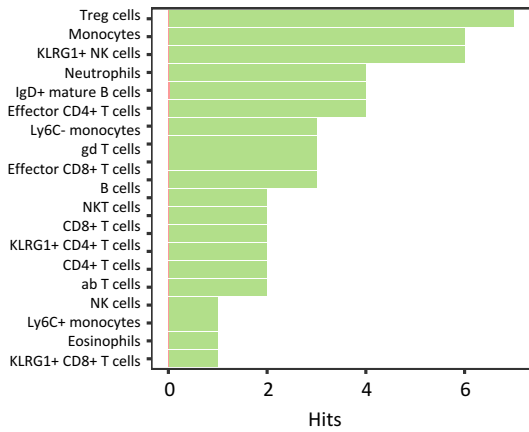

## b Bone marrow

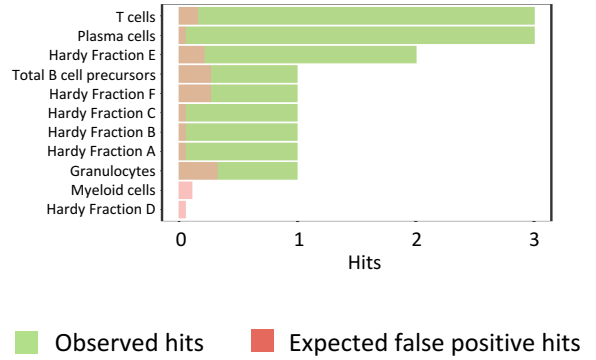

## c Spleen

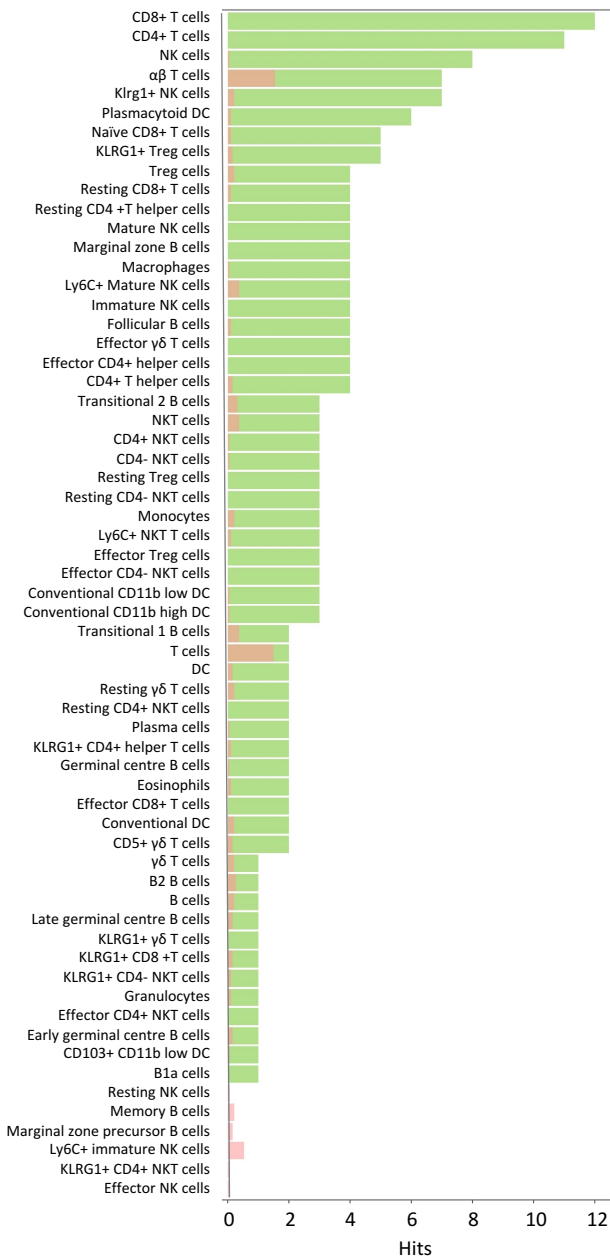

## d Mesenteric lymph node

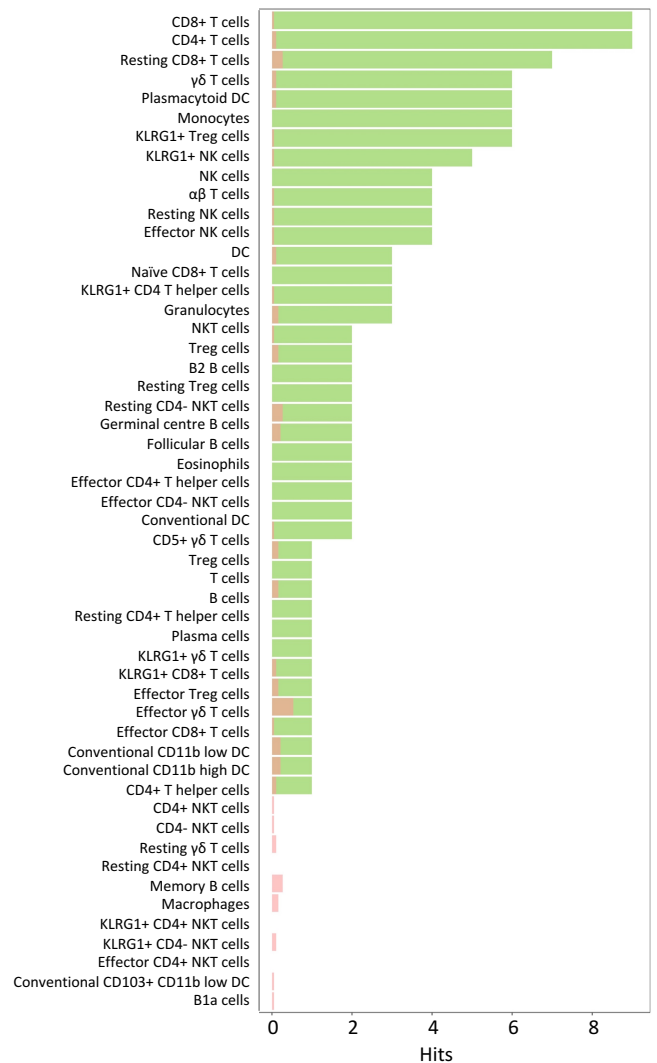

# Supplementary Figure 5

a

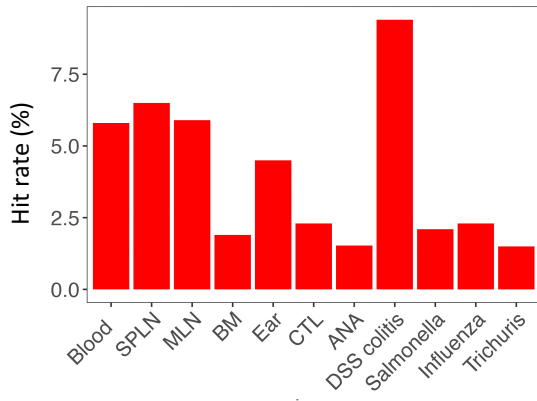

b

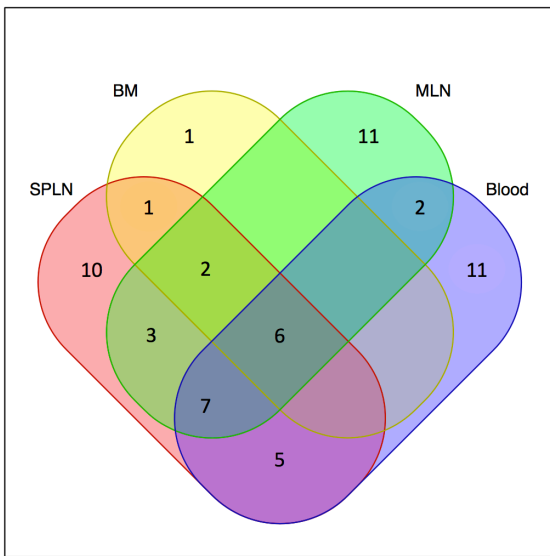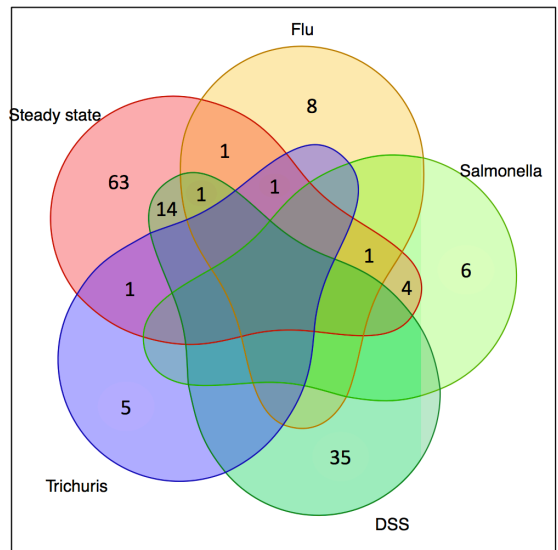

# Supplementary Figure 6

**a**

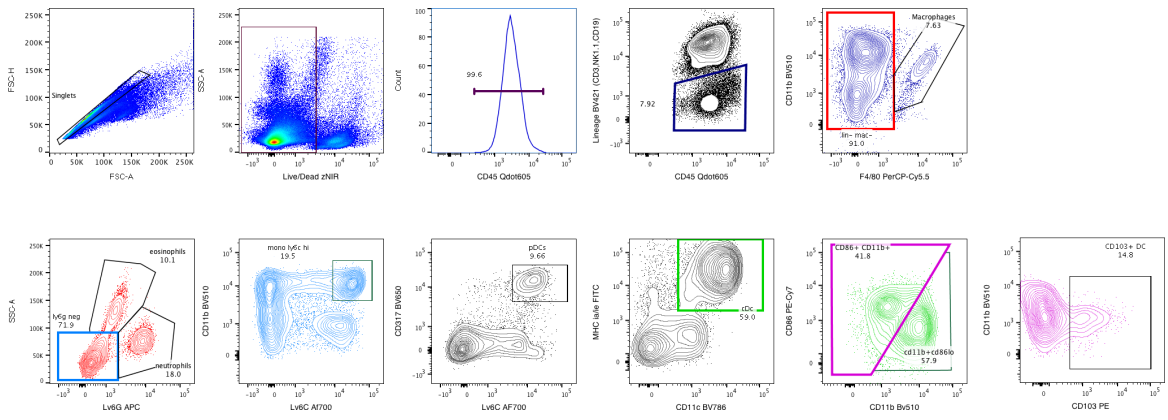

**b**

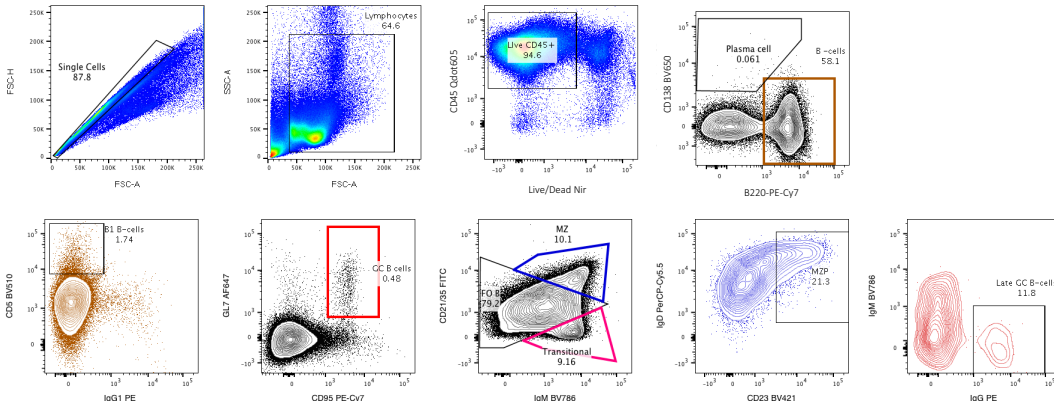

**c**

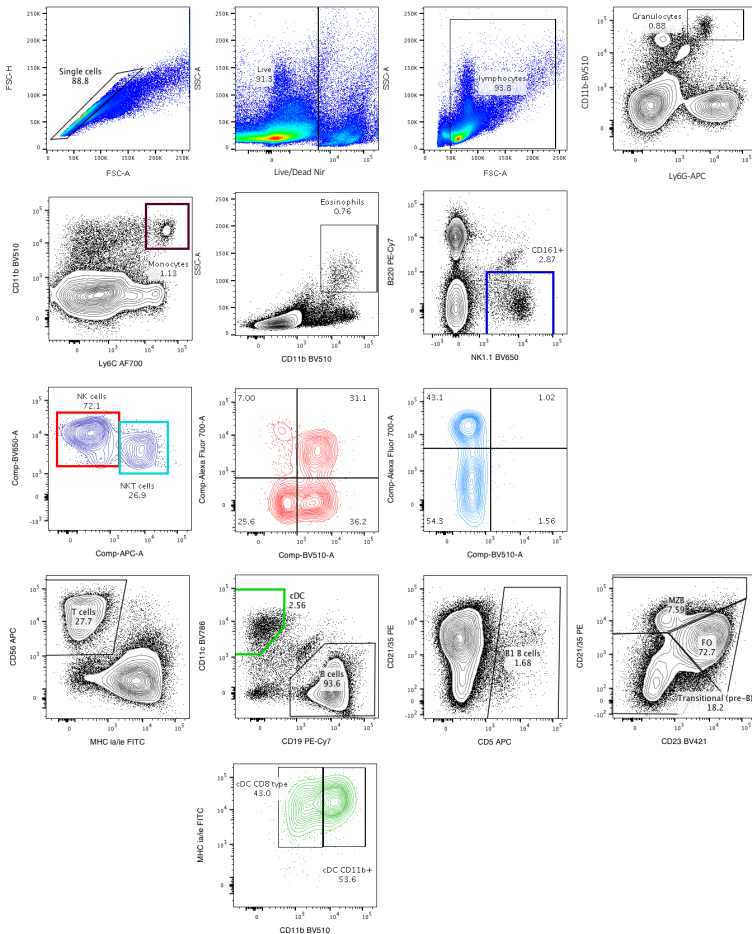



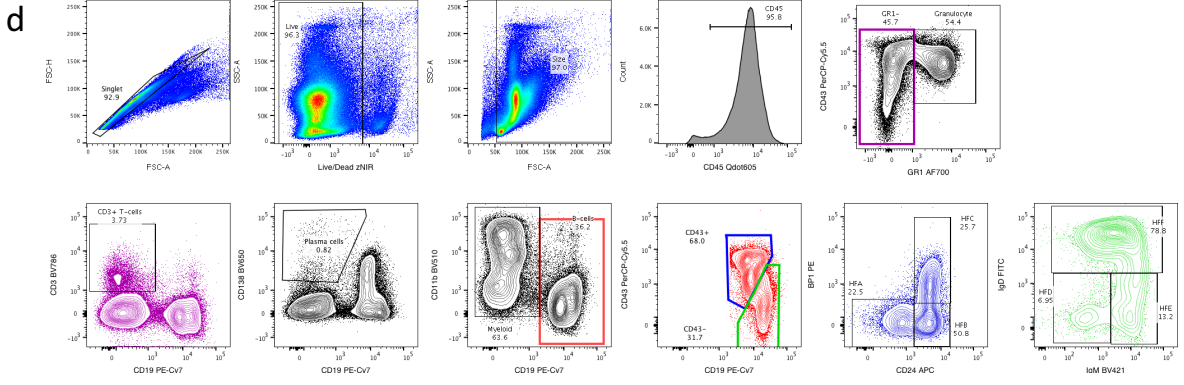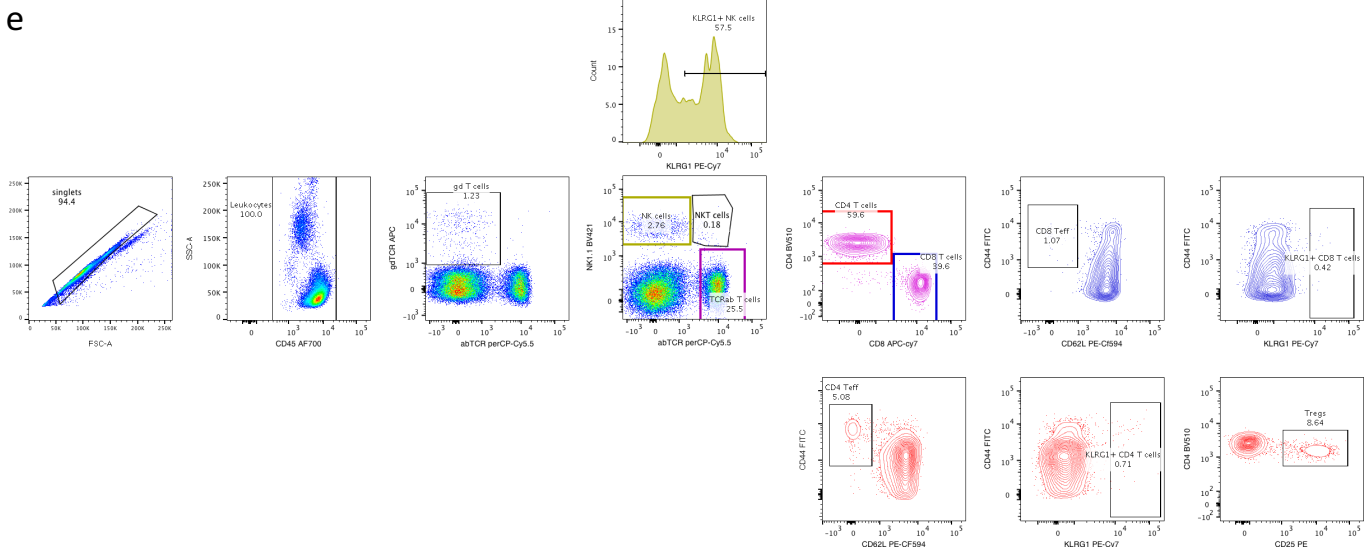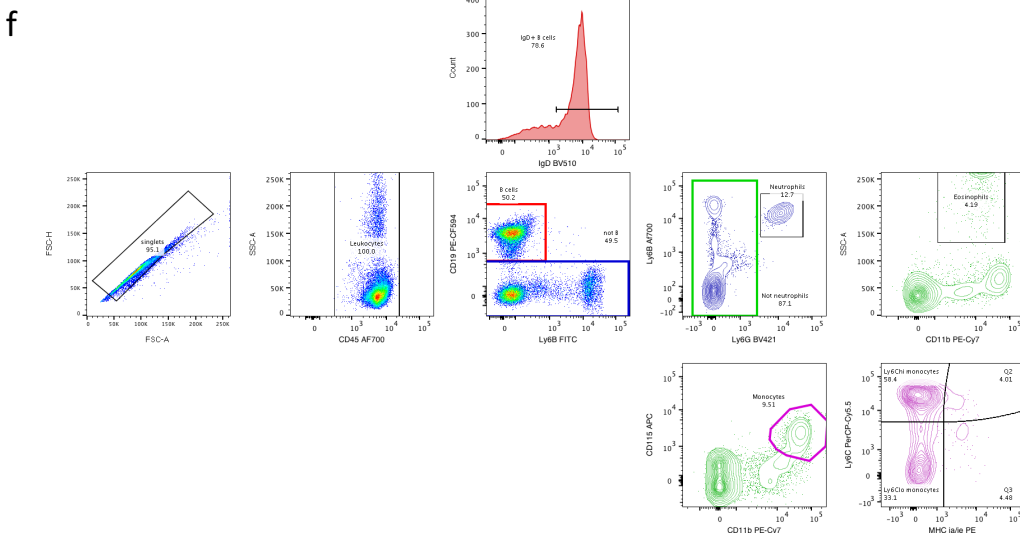

### Supplementary Figure 1: Assay overview.

- a. Overview of the IMPC tests performed at Wellcome Trust Sanger Institute (WTSI) prior to the substantial expansion by 3i.
- b. Flow cytometry screen. Representative MLN data illustrate gating strategy for T cells, NKT cells and NK cells. Subsets of key populations are shown in gates of the same colour. Percentages denote percentages of parent population. Panels can be found in Supplementary Table 1, populations are quantitated in Supplementary Table 2.
- c. Epidermis screen. Left panel: Maximal intensity projection of a z-stack 2-channel overlay. Pseudocolouring scheme was applied to represent Dendritic Epidermal  $V\gamma 5^+$   $\gamma\delta$  T Cells (DETC) in red and MHC-II+ Langerhans cells (LC) in cyan, scale bar 50  $\mu\text{m}$ . Middle panel: 3D quantitative object-based image analysis (Definiens Developer XD) of DETC that contact LC (red) versus not contacting LC (yellow), and LC (cyan); scale bar: 50  $\mu\text{m}$ . Right panel: 3D representation of a DETC rendering in Definiens Developer from which parameters such as dendricity and roundness were quantitated; scale bar: 10  $\mu\text{m}$ . Measurements were performed on three vision fields from the same slide per animal.
- d. ANA screen. Antinuclear antibody staining in Hep2 cells using serum from wt mice and different ko lines. Sera were scored on a scale of 0 to 4. The images illustrate that sera from wt or specific mutant strains do not all score equally. Scores of  $\leq 1$  were regarded as negative; scores of  $\geq 2$  as positive. Test performed once per animal.
- e. DSS histology screen. Left: Body weight curves of wt and *Arhgef1*<sup>-/-</sup> mice in the same experiment (n=4[2M2F] for wt; n=4[2M2f] for *Arhgef1*<sup>-/-</sup>). Middle: histopathology scores of wt and *Arhgef1*<sup>-/-</sup> mice. Symbols denote the average histopathology score for mid- and distal-colon in each mouse, and horizontal bars represent the median across mice for this group. Right: representative photomicrographs of H&E-stained colonic sections of wt and *Arhgef1*<sup>-/-</sup> mice; scale bar 0.2 mm. One mid-colon and one distal colon section scored per animal.
- f. Longitudinal monitoring of manually analysed flow cytometry data for quality controls (QC), illustrated by CD4<sup>+</sup> T helper cells. Daily inner quantiles are shaded dark blue, outer quantiles light blue, middle line is daily median. All individual data points

are shown. Temporal QC are further considered in Materials and Methods.

- g. Top GO-slim categories (all categories with raw p-value < 0.01 shown, two-sided Fisher's exact test) among 466 of genes with GO annotation in 3i gene set. X axis: number of genes from given category in the 3i set. Coloured by ratio of observed to expected number of genes. Red frame: immune-system related categories. Categories significantly different from whole mouse genome at FDR 5% marked with asterisk.
- h. Variation in immune cell subsets (colours denote cell lineages) detected by flow cytometry (denoted by size of circles). Data from 16-week old wt C57BL/6N SPL (n>500 for all parameters).
- i. Variation and sexual dimorphism in analyses of ear epidermal microscopy; CD8 cytotoxicity; DSS colitis; and ANA. Lower panel: sexual dimorphism of mean values as log<sub>2</sub> fold change (middle panel, female/male); colour indicates p value (two tailed unpaired t test) Upper panel: coefficient of variation; colour indicates assay. Number of wt samples for each of the assays are listed in Supplementary Table 3.

**Supplementary Figure 2: Immunological correlations across parameters**

Heat map represents Pearson correlations of 46 splenic immune cell subsets with each other in wt females (n>230 for all parameters) as determined by flow cytometry. Dark red fields denote strong positive, dark blue fields strong negative correlations.

**Supplementary Figure 3: Non-immunological correlations across parameters**

Correlations of nonimmune parameters (haematological, clinical blood chemistry, and additional data) in males (a) and females (b). Depicted are correlations with an R-value >0.33 and p<0.001; red lines denote positive correlations; blue lines, negative correlations (n>780 per sex for all parameters).

**Supplementary Figure 4: False positive rates are far below hit rates.**

Expected number of false positives estimated by simulation (re-sampling of wt controls, performed 10000 times and adjusted to the actual number of performed tests per parameter) compared to the number of significant phenotypes detected in: (a) PBL

(n>450 per sex for all parameters), (b) BM (n>350 per sex for all parameters), (c) SPL (n>250 per sex for all parameters), and (d) MLN (n>250 per sex for all parameters). Observed hits depicted in green; expected false positives in red. Significance established by windowed 70 wt mice reference range, details in Materials and Methods.

**Supplementary Figure 5: 140 out of 530 genes perturb the immunophenotype**

- a. Hit rate per assay.
- b. Venn diagrams showing the overlap of significantly different phenotypes between assays.

**Supplementary Figure 6:** Flow cytometry gating strategies. Subsets of key populations are shown in gates of the same colour. Percentages denote percentages of parent population. Panels can be found in Supplementary Table 1, populations are quantitated in Supplementary Table 2. T cells from spleen can be found in Supplementary Fig 1b.

Representative data for:

- a. Myeloid cells (data from spleen)
- b. B cells (data from spleen)
- c. Additional NK subsets (data from spleen)
- d. Bone marrow
- e. T/NK cells (data from blood)
- f. B cells/monocytes (data from blood)

## Supplementary Tables 1-5

### Supplementary Table 1

Markers and fluorochromes used to identify immune cell populations by flow cytometry

| Laser | LP Filter | BP filter | Fluoro-chrome | SPL/MLN T/NK cells | SPL/MLN B cells | SPL/MLN Myeloid cells | SPL Myeloid / B cells | Bone marrow |
|-------|-----------|-----------|---------------|--------------------|-----------------|-----------------------|-----------------------|-------------|
| 405   | -         | 450/50    | BV421         | Klrg1              | CD23            | CD5/19/161            | CD23                  | IgM         |
| 405   | 505       | 525/50    | BV510         | CD5                | CD5             | CD11b                 | CD11b                 | CD11b       |
| 405   | 595       | 610/20    | Qdot-605      | CD45               | CD45            | CD45                  |                       | CD45        |
| 405   | 630       | 670/30    | BV650         | CD161              | CD138           | CD317                 | CD161                 | CD138       |
| 405   | 750       | 780/60    | BV786         | CD4                | IgM             | CD11c                 | CD11c                 | CD3         |
| 488   | 505       | 530/30    | FITC          | CD44               | CD21/35         | MHC II                | MHC II                | IgD         |
| 488   | 685       | 710/50    | PerCP-Cy5.5   | CD62L              | IgD             | F4/80                 |                       | CD43        |
| 561   | 570       | 585/15    | PE            | GITR               | IgG1            | CD103                 | CD21/35               | BP-1        |
| 561   | 750       | 780/60    | PE-Cy7        | TCR $\delta$       | CD95            | CD86                  | CD19                  | B220        |
| 640   | -         | 670/14    | APC           | CD25               |                 | Ly6G                  | CD5                   | CD24        |
|       |           |           | AF647         |                    | GL7             |                       |                       |             |
| 640   | 690       | 730/45    | AF700         | CD8 $\alpha$       | B220            | Ly6C                  | Ly6C                  | Gr1         |
| 640   | 750       | 780/60    | NIR           | Live/Dead          | Live/Dead       | Live/Dead             | Live/Dead             | Live/Dead   |

| Laser | LP Filter | BP filter | Fluoro-chrome | PBL T/NK cells | PBL Myeloid/ B cells |
|-------|-----------|-----------|---------------|----------------|----------------------|
| 405   | -         | 450/50    | BV421         | CD161          |                      |
|       |           |           | V450          |                | Ly6G                 |
| 405   | 505       | 525/50    | BV510         | CD4            | IgD                  |
| 488   | 505       | 530/30    | FITC          | CD44           | Ly6B                 |
| 488   | 550       | 575/26    | PE            | CD25           | MHC II               |
| 488   | 600       | 610/20    | PE-CF594      | CD62L          | CD19                 |
| 488   | 685       | 695/40    | PerCP-Cy5.5   | TCR $\beta$    | Ly6C                 |
| 488   | 755       | 780/60    | PE-Cy7        | Klrg1          | CD11b                |
| 633   | -         | 660/20    | APC           | TCR $\delta$   | CD115                |
| 633   | 710       | 730/45    | AF700         | CD45           | CD45                 |
| 633   | 755       | 780/60    | APC-H7        | CD8 $\alpha$   |                      |

**Supplementary Table 2:** Parameters of flow cytometry and ear epidermis assays

| Parameter                                         | Cell markers                                                              |
|---------------------------------------------------|---------------------------------------------------------------------------|
| <i>Spleen and mesenteric lymph node</i>           |                                                                           |
| <b>Total <math>\gamma\delta</math> T cells</b>    | TCR $\delta$ +                                                            |
| <b>CD5+ <math>\gamma\delta</math> T cells</b>     | TCR $\delta$ + CD5+                                                       |
| <b>Effector <math>\gamma\delta</math> T cells</b> | TCR $\delta$ + CD62L- CD44+                                               |
| <b>Resting <math>\gamma\delta</math> T cells</b>  | TCR $\delta$ + CD62L+                                                     |
| <b>KLRG1+ <math>\gamma\delta</math> T cells</b>   | TCR $\delta$ + KLRG1+                                                     |
| <b>Total <math>\alpha\beta</math> T cells</b>     | TCR $\delta$ - CD5+ CD4+ or CD8+                                          |
| <b>Total CD4+ T cells</b>                         | TCR $\delta$ - CD5+ CD4+                                                  |
| <b>CD4+ T helper cells</b>                        | TCR $\delta$ - CD5+ CD4+ CD25- GITR-                                      |
| <b>Effector CD4+ T helper cells</b>               | TCR $\delta$ - CD5+ CD4+ CD25- GITR- CD62L- CD44+                         |
| <b>Resting CD4+ T helper cells</b>                | TCR $\delta$ - CD5+ CD4+ CD25- GITR- CD62L+                               |
| <b>KLRG1+ CD4+ T helper cells</b>                 | TCR $\delta$ - CD5+ CD4+ CD25- GITR- KLRG1+                               |
| <b>Total T<sub>reg</sub> cells</b>                | TCR $\delta$ - CD5+ CD4+ CD25+ GITR+                                      |
| <b>Effector T<sub>reg</sub> cells</b>             | TCR $\delta$ - CD5+ CD4+ CD25+ GITR+ CD62L- CD44+                         |
| <b>Resting T<sub>reg</sub> cells</b>              | TCR $\delta$ - CD5+ CD4+ CD25+ GITR+ CD62L+                               |
| <b>KLRG1+ T<sub>reg</sub> cells</b>               | TCR $\delta$ - CD5+ CD4+ CD25+ GITR+ KLRG1+                               |
| <b>Total CD8+ T cells</b>                         | TCR $\delta$ - CD5+ CD8+                                                  |
| <b>Effector CD8+ T cells</b>                      | TCR $\delta$ - CD5+ CD8+ CD62L- CD44+                                     |
| <b>Resting CD8+ T cells</b>                       | TCR $\delta$ - CD5+ CD8+ CD62L+ CD44+                                     |
| <b>Naive CD8+ T cells</b>                         | TCR $\delta$ - CD5+ CD8+ CD62L+ CD44-                                     |
| <b>KLRG1+ CD8+ T cells</b>                        | TCR $\delta$ - CD5+ CD8+ KLRG1+                                           |
| <b>Total NKT cells</b>                            | TCR $\delta$ - CD5+ CD161+                                                |
| <b>Total CD4- NKT cells</b>                       | TCR $\delta$ - CD5+ CD161+ CD4-                                           |
| <b>Effector CD4- NKT cells</b>                    | TCR $\delta$ - CD5+ CD161+ CD4- CD62L-                                    |
| <b>Resting CD4- NKT cells</b>                     | TCR $\delta$ - CD5+ CD161+ CD4- CD62L+                                    |
| <b>KLRG1+ CD4- NKT cells</b>                      | TCR $\delta$ - CD5+ CD161+ CD4- KLRG1+                                    |
| <b>Total CD4+ NKT cells</b>                       | TCR $\delta$ - CD5+ CD161+ CD4+                                           |
| <b>Effector CD4+ NKT cells</b>                    | TCR $\delta$ - CD5+ CD161+ CD4+ CD62L-                                    |
| <b>Resting CD4+ NKT cells</b>                     | TCR $\delta$ - CD5+ CD161+ CD4+ CD62L+                                    |
| <b>KLRG1+ CD4+ NKT cells</b>                      | TCR $\delta$ - CD5+ CD161+ CD4+ KLRG1+                                    |
| <b>Total NK cells</b>                             | TCR $\delta$ - CD5- CD161+                                                |
| <b>Effector NK cells</b>                          | TCR $\delta$ - CD5- CD161+ CD62L-                                         |
| <b>Resting NK cells</b>                           | TCR $\delta$ - CD5- CD161+ CD62L+                                         |
| <b>KLRG1+ NK cells</b>                            | TCR $\delta$ - CD5- CD161+ KLRG1+                                         |
| <b>Plasma cells</b>                               | CD138+                                                                    |
| <b>B1a cells</b>                                  | CD138- B220+ CD5+                                                         |
| <b>B2 cells</b>                                   | CD138- B220+ CD5-                                                         |
| <b>Follicular B cells</b>                         | CD138- B220+ CD5- GL7- CD95- CD21/35 <sup>int</sup><br>IgM <sup>int</sup> |
| <b>Memory B cells</b>                             | CD138- B220+ CD5- GL7- CD95- IgG+                                         |
| <b>Macrophages</b>                                | F4/80+ CD11b <sup>int</sup>                                               |
| <b>Granulocytes</b>                               | F4/80- Ly6G <sup>high</sup> CD11b+                                        |
| <b>Eosinophils</b>                                | F4/80- Ly6G <sup>int</sup> CD11b+ SSC <sup>high</sup>                     |

|                                                   |                                                                                                               |
|---------------------------------------------------|---------------------------------------------------------------------------------------------------------------|
| <b>Monocytes</b>                                  | F4/80- Ly6G- Ly6C <sup>high</sup> CD11b+                                                                      |
| <b>Plasmacytoid DC</b>                            | F4/80- Ly6G- Ly6C <sup>low/int</sup> CD317+                                                                   |
| <b>Conventional DC</b>                            | F4/80- Ly6G- Ly6C <sup>low/int</sup> CD317- CD11c+ MHCII+                                                     |
| <b>Conventional CD11b<sup>high</sup> DC</b>       | F4/80- Ly6G- Ly6C <sup>low/int</sup> CD317- CD11c+ MHCII+<br>CD11b <sup>high</sup> CD86 <sup>low</sup>        |
| <b>Conventional CD11b<sup>low</sup> DC</b>        | F4/80- Ly6G- Ly6C <sup>low/int</sup> CD317- CD11c+ MHCII+<br>CD11b <sup>low</sup> CD86 <sup>high</sup>        |
| <b>CD103+ conventional CD11b<sup>low</sup> DC</b> | F4/80- Ly6G- Ly6C <sup>low/int</sup> CD317- CD11c+ MHCII+<br>CD11b <sup>low</sup> CD86 <sup>high</sup> CD103+ |
| <i>Spleen only</i>                                |                                                                                                               |
| <b>Immature NK cells</b>                          | Ly6G- CD161+ CD5- CD11b- Ly6C-                                                                                |
| <b>Ly6C+ immature NK cells</b>                    | Ly6G- CD161+ CD5- CD11b- Ly6C+                                                                                |
| <b>Mature NK cells</b>                            | Ly6G- CD161+ CD5- CD11b+ Ly6C-                                                                                |
| <b>Ly6C+ mature NK cells</b>                      | Ly6G- CD161+ CD5- CD11b+ Ly6C+                                                                                |
| <b>Germinal centre B cells</b>                    | CD138- B220+ CD5- GL7+ CD95+                                                                                  |
| <b>Early germinal centre B cells</b>              | CD138- B220+ CD5- GL7+ CD95+ IgM+ IgG-                                                                        |
| <b>Late germinal centre B cells</b>               | CD138- B220+ CD5- GL7+ CD95+ IgM- IgG+                                                                        |
| <b>Marginal zone precursor B cells</b>            | CD138- B220+ CD5- GL7- CD95- CD21/35+<br>CD23-                                                                |
| <b>Marginal zone B cells</b>                      | CD138- B220+ CD5- GL7- CD95- CD21/35+<br>CD23+                                                                |
| <b>Transitional 1 B cells</b>                     | CD138- B220+ CD5- GL7- CD95- CD21/35-<br>CD23-                                                                |
| <b>Transitional 2 B cells</b>                     | CD138- B220+ CD5- GL7- CD95- CD21/35-<br>CD23+                                                                |
| <i>Blood</i>                                      |                                                                                                               |
| <b>Total T cells</b>                              | TCRβ+ or TCRδ+                                                                                                |
| <b>Total αβ T cells</b>                           | TCRβ+                                                                                                         |
| <b>Total CD4+ T cells</b>                         | TCRβ+ CD4+                                                                                                    |
| <b>Effector CD4+ T cells</b>                      | TCRβ+ CD4+ CD62L- CD44+                                                                                       |
| <b>KLRG1+ CD4+ T cells</b>                        | TCRβ+ CD4+ KLRG1+                                                                                             |
| <b>Total T<sub>reg</sub> cells</b>                | TCRβ+ CD4+ CD25+                                                                                              |
| <b>Total CD8+ T cells</b>                         | TCRβ+ CD8+                                                                                                    |
| <b>Effector CD8+ T cells</b>                      | TCRβ+ CD8+ CD62L- CD44+                                                                                       |
| <b>KLRG1+ CD8+ T cells</b>                        | TCRβ+ CD8+ KLRG1+                                                                                             |
| <b>Total γδ T cells</b>                           | TCRδ+                                                                                                         |
| <b>Total NKT cells</b>                            | TCRβ+ CD161+                                                                                                  |
| <b>Total NK cells</b>                             | TCRβ- CD161+                                                                                                  |
| <b>KLRG1+ NK cells</b>                            | TCRβ- CD161+ KLRG1+                                                                                           |
| <b>Total B cells</b>                              | CD19+                                                                                                         |
| <b>IgD+ mature B cells</b>                        | CD19+ IgD+                                                                                                    |
| <b>Monocytes</b>                                  | CD19- Ly6G- CD11b+                                                                                            |
| <b>Ly6C+ monocytes</b>                            | CD19- Ly6G- CD11b+ Ly6C+                                                                                      |
| <b>Ly6C- monocytes</b>                            | CD19- Ly6G- CD11b+ Ly6C-                                                                                      |

|                                                                                    |                                              |
|------------------------------------------------------------------------------------|----------------------------------------------|
| <b>Neutrophils</b>                                                                 | CD19- Ly6G+ Ly6B+                            |
| <b>Eosinophils</b>                                                                 | CD19- Ly6B- Ly6G- SSC <sup>high</sup> CD11b+ |
| <i>Bone marrow</i>                                                                 |                                              |
| <b>Granulocytes</b>                                                                | GR+ CD43+                                    |
| <b>T cells</b>                                                                     | GR- CD3+                                     |
| <b>Plasma cells</b>                                                                | GR- CD3- CD138+                              |
| <b>Myeloid cells</b>                                                               | GR- CD3- CD138- CD11b+                       |
| <b>Total B cell precursors</b>                                                     | GR- CD3- CD138- B220+                        |
| <b>Pre-pro B cells (Hardy fraction A)</b>                                          | GR- CD3- CD138- B220+ CD43+ BP1- CD24-       |
| <b>Pro-B cells (Hardy fraction B)</b>                                              | GR- CD3- CD138- B220+ CD43+ BP1- CD24+       |
| <b>Pro-B cells (Hardy fraction C)</b>                                              | GR- CD3- CD138- B220+ CD43+ BP1+ CD24+       |
| <b>Pre-B cells (Hardy fraction D)</b>                                              | GR- CD3- CD138- B220+ CD43- IgD- IgM-        |
| <b>Immature B cells (Hardy fraction E)</b>                                         | GR- CD3- CD138- B220+ CD43- IgD- IgM+        |
| <b>Mature B cells (Hardy fraction F)</b>                                           | GR- CD3- CD138- B220+ CD43- IgD+ IgM+        |
| <i>Ear epidermis</i>                                                               |                                              |
| <b>DETC coverage</b>                                                               |                                              |
| <b>Count of DETC V<math>\gamma</math>5+</b>                                        |                                              |
| <b>Count of atypical CD45+ cells</b>                                               |                                              |
| <b>Count of DETC V<math>\gamma</math>5+ contacting LC</b>                          |                                              |
| <b>Count of DETC V<math>\gamma</math>5+ not contacting LC</b>                      |                                              |
| <b>Count of LC</b>                                                                 |                                              |
| <b>Average volume of DETC V<math>\gamma</math>5+</b>                               |                                              |
| <b>Average volume of atypical CD45+ cells</b>                                      |                                              |
| <b>Average volume of DETC V<math>\gamma</math>5+ contacting LC</b>                 |                                              |
| <b>Average volume of DETC V<math>\gamma</math>5+ not contacting LC</b>             |                                              |
| <b>Average volume of LC</b>                                                        |                                              |
| <b>Average roundness of DETC V<math>\gamma</math>5+</b>                            |                                              |
| <b>Average roundness of atypical CD45+ cells</b>                                   |                                              |
| <b>Average roundness of DETC V<math>\gamma</math>5+ contacting LC</b>              |                                              |
| <b>Average roundness of DETC V<math>\gamma</math>5+ not contacting LC</b>          |                                              |
| <b>Average roundness of LC</b>                                                     |                                              |
| <b>Average number of branches on DETC V<math>\gamma</math>5+</b>                   |                                              |
| <b>Average number of branches on DETC V<math>\gamma</math>5+ contacting LC</b>     |                                              |
| <b>Average number of branches on DETC V<math>\gamma</math>5+ not contacting LC</b> |                                              |
| <b>Average number of branches on LC</b>                                            |                                              |
| <b>Average branch length of on DETC V<math>\gamma</math>5+</b>                     |                                              |
| <b>Average branch length of on DETC V<math>\gamma</math>5+ contacting LC</b>       |                                              |
| <b>Average branch length of on DETC V<math>\gamma</math>5+ not contacting LC</b>   |                                              |



**Supplementary Table 3:** Summary of statistical procedures per assay and readout

| Assay                           | Readouts                                                                                                                                                                                                                       | Statistical test                                                                                                                                                                                                                                                                                       | Choice of controls                  | Successfully phenotyped strains/mice                     |
|---------------------------------|--------------------------------------------------------------------------------------------------------------------------------------------------------------------------------------------------------------------------------|--------------------------------------------------------------------------------------------------------------------------------------------------------------------------------------------------------------------------------------------------------------------------------------------------------|-------------------------------------|----------------------------------------------------------|
| Ear epidermis (2F, 2M)          | Number of cells and morphological parameters recorded by 3D confocal analysis and analysed by an automated script using Definiens developer software                                                                           | Mutant samples were considered phenodeviant when falling into the lower or upper 2.5 percentiles of the wild type distribution of their respective sex. A mutant line was considered phenodeviant when $\geq 60\%$ of samples across sexes (3/4 or 3/3) fell outside their respective reference range. | all wt data, sex-matched            | 496 genes<br>499 strains<br>2066 ko mice<br>728 wt mice  |
| Cytotoxic T cell lysis (2F, 2M) | Percentage of target cell lysis recorded relative to a positive control (detergent)                                                                                                                                            | As for ear epidermis. A sample was considered outside the reference range if three consecutive points in the target:effector ratio fell outside the reference range for this ratio.                                                                                                                    | all wt data, sex-matched            | 263 genes<br>265 strains<br>1130 ko mice<br>566 wt mice  |
| Blood (7F, 7M)                  | Frequencies/cell numbers of cell populations recorded by flow cytometry. Frequencies are reported as a percentage of parental population, absolute numbers are calculated using white blood cell counts from haematology data. | As for ear epidermis, but owing to the larger sample size, phenodeviants were also identified within each sex separately.*                                                                                                                                                                             | all wt data, sex-matched            | 530 genes<br>533 strains<br>7010 ko mice<br>2652 wt mice |
| Spleen/MLN/BM (3F, 3M)          | Frequencies of cell populations recorded by flow cytometry.                                                                                                                                                                    | As for ear epidermis. A mutant line was considered phenodeviant when $\geq 60\%$ of samples                                                                                                                                                                                                            | 70 sex matched wt samples that were | Spleen:<br>517 genes<br>520 strains<br>3169 ko mi.       |

|                                                           |                                                                                                                                                                                 |                                                                                                                                                                                                                                                                                         |                                                                               |                                                                                                                                                                 |
|-----------------------------------------------------------|---------------------------------------------------------------------------------------------------------------------------------------------------------------------------------|-----------------------------------------------------------------------------------------------------------------------------------------------------------------------------------------------------------------------------------------------------------------------------------------|-------------------------------------------------------------------------------|-----------------------------------------------------------------------------------------------------------------------------------------------------------------|
|                                                           | Frequencies are reported as a percentage of parental population or as percentage of CD45 <sup>+</sup> , live, single cells.                                                     | across sexes (6/6, 5/6, 4/6, 3/5, 3/4 or 3/3) fell outside their respective reference range.                                                                                                                                                                                            | closest in time to the mutant sample assessed.                                | 947 wt mice<br><br>MLN:<br>508 genes<br>511 strains<br>2986 ko mi.<br>858 wt mice<br><br>Bone marrow:<br>479 genes<br>482 strains<br>2622 ko mi.<br>795 wt mice |
| DSS histology and weight data (2F, 2M or 4F)              | A) Histological scoring of gut sections<br>B) Percentage of reduction in body weight compared to the start of the experiment.                                                   | As for ear epidermis                                                                                                                                                                                                                                                                    | sex-matched wt data, 70 individuals closest in starting weight (A) or age (B) | 489 genes<br>492 strains<br>2001 ko mice<br>868 wt mice                                                                                                         |
| Salmonella bacterial burden and serum antibodies (4F, 4M) | A) Colony forming units (CFU) of bacteria cultured on LB agar isolated from spleen and liver homogenates<br>B) Titers of antigen-specific antibodies in serum measured by ELISA | Hits were identified by a Mann-Whitney-U test with a p-value cut-off of 0.05 in comparison to concurrent wt controls, combining data from male and female mice. Significant lines were retested with a second cohort. A final call was made on the combined data from both experiments. | concurrent wt controls                                                        | 516 genes<br>518 strains<br>4133 ko mice<br>1723 wt mice                                                                                                        |
| Influenza weight data: (3F, 3M)                           | Percentage of reduction in body weight compared to the start of the experiment.                                                                                                 | Hits were identified by fitting a robust mixed model (corresponding to two-way Anova) with a p-value cut-off of 0.0001, in comparison to concurrent wt controls, taking into account sex and genotype, using the R package Phenstat <sup>61</sup> . Residuals were assumed              | concurrent wt controls                                                        | 489 genes<br>490 strains<br>3033 ko mice<br>1054 wt mice                                                                                                        |

|                                 |                                                                                                                                                              |                                                                                                                                                                                                                     |                                                      |                                                          |
|---------------------------------|--------------------------------------------------------------------------------------------------------------------------------------------------------------|---------------------------------------------------------------------------------------------------------------------------------------------------------------------------------------------------------------------|------------------------------------------------------|----------------------------------------------------------|
|                                 |                                                                                                                                                              | to be normally distributed.                                                                                                                                                                                         |                                                      |                                                          |
| ANA<br>(3F, 3M)                 | Scores for ANA positivity assessed by microscopy and analysed using a Python script. Scores from 0 to 1.5 were considered negative; scores of 2- 4 positive. | Hits were identified by Fisher's exact test with a p-value cut-off of 0.01, comparing the frequency of positive samples in mutant and wt                                                                            | wt animals from the contemporaneous 3 months' period | 518 genes<br>520 strains<br>3286 ko mice<br>1123 wt mice |
| Trichuris<br>(6F)               | Presence or absence of worms in the cecum on day 33 as categorical measure.                                                                                  | Hits were identified by Fisher's exact test with a p-value cut-off of 0.01, comparing the frequency of positive samples in mutant and wt.                                                                           | all wt animals                                       | 287 genes<br>289 strains<br>1704 ko mice<br>431 wt mice  |
| DSS and influenza survival data | Number of mice having to be culled because of excessive weight loss before the end of the experiment                                                         | Hits were identified by Fisher's exact test with a p-value cut-off of 0.01, comparing the frequency of mice with above threshold weight loss in a mutant strain with wt population, combining data from both sexes. | all wt animals                                       | as for DSS and influenza above                           |

\*Please note that Blood hits are analysed with a mixed model on the IMPC website as the IMPC statistical pipeline was not offering the option of a reference range approach at the time of writing. The number of hits for blood is therefore higher on the IMPC website.

**Supplementary Table 4: Alleles of knockout lines included in the study**

|                                           |                                      |                                    |
|-------------------------------------------|--------------------------------------|------------------------------------|
| 1700001C02Rik <sup>tm1a(EUCOMM)Wtsi</sup> | Dpy30 <sup>tm1a(KOMP)Wtsi</sup>      | Pclaf <sup>tm1a(EUCOMM)Wtsi</sup>  |
| 1700007K13Rik <sup>tm2b(EUCOMM)Wtsi</sup> | Duoxa2 <sup>tm1b(KOMP)Wtsi</sup>     | Pdcd2 <sup>tm1b(EUCOMM)Wtsi</sup>  |
| 1700011A15Rik <sup>tm1a(KOMP)Wtsi</sup>   | Dusp5 <sup>tm1a(KOMP)Wtsi</sup>      | Pdia4 <sup>tm1b(EUCOMM)Wtsi</sup>  |
| 1700024P04Rik <sup>tm1b(EUCOMM)Wtsi</sup> | Dynlrb2 <sup>tm1a(KOMP)Wtsi</sup>    | Pdk3 <sup>tm2a(KOMP)Wtsi</sup>     |
| 1700029H14Rik <sup>tm2b(KOMP)Wtsi</sup>   | Eci3 <sup>tm1b(EUCOMM)Wtsi</sup>     | Pdzk1 <sup>tm2b(EUCOMM)Wtsi</sup>  |
| 1700034J05Rik <sup>tm1a(KOMP)Wtsi</sup>   | Eif3h <sup>tm1a(EUCOMM)Hmgu</sup>    | Pepd <sup>tm1a(KOMP)Wtsi</sup>     |
| 1700067K01Rik <sup>tm2a(KOMP)Wtsi</sup>   | Elac2 <sup>tm1b(EUCOMM)Wtsi</sup>    | Pgap2 <sup>tm1b(EUCOMM)Wtsi</sup>  |
| 1700112E06Rik <sup>tm1e(EUCOMM)Wtsi</sup> | Ell2 <sup>tm1b(EUCOMM)Wtsi</sup>     | Pigf <sup>tm1a(KOMP)Wtsi</sup>     |
| 1700123O20Rik <sup>tm1a(EUCOMM)Wtsi</sup> | Enc1 <sup>tm1a(EUCOMM)Wtsi</sup>     | Pigl <sup>tm1b(KOMP)Wtsi</sup>     |
| 2010300C02Rik <sup>tm1b(KOMP)Wtsi</sup>   | Enthd2 <sup>tm1b(KOMP)Wtsi</sup>     | Pitrm1 <sup>tm1a(KOMP)Wtsi</sup>   |
| 2610034B18Rik <sup>tm1b(EUCOMM)Wtsi</sup> | Erlin2 <sup>tm1a(EUCOMM)Wtsi</sup>   | Pitx1 <sup>em1(IMPC)Wtsi</sup>     |
| 3300002A11Rik <sup>tm1a(KOMP)Wtsi</sup>   | Evi5 <sup>tm1a(KOMP)Wtsi</sup>       | Pla2g6 <sup>tm1a(EUCOMM)Wtsi</sup> |
| 3830406C13Rik <sup>tm1b(KOMP)Wtsi</sup>   | Exoc3l2 <sup>tm1b(KOMP)Wtsi</sup>    | Pld3 <sup>tm1e(EUCOMM)Wtsi</sup>   |
| 4930404H24Rik <sup>tm1a(KOMP)Wtsi</sup>   | Exosc9 <sup>tm1b(EUCOMM)Wtsi</sup>   | Plet1 <sup>em1(IMPC)Wtsi</sup>     |
| 4930590J08Rik <sup>tm1a(EUCOMM)Wtsi</sup> | Fads3 <sup>tm1b(EUCOMM)Wtsi</sup>    | Plscr2 <sup>tm1b(KOMP)Wtsi</sup>   |
| 4931429L15Rik <sup>tm1a(EUCOMM)Wtsi</sup> | Fam122c <sup>tm1b(EUCOMM)Wtsi</sup>  | Plxnb3 <sup>tm1a(KOMP)Wtsi</sup>   |
| 4932431P20Rik <sup>em1(IMPC)Wtsi</sup>    | Fam160a1 <sup>tm1b(EUCOMM)Wtsi</sup> | Polb <sup>tm1a(KOMP)Wtsi</sup>     |
| 4933402N03Rik <sup>tm2a(KOMP)Wtsi</sup>   | Fam163a <sup>tm2b(KOMP)Wtsi</sup>    | Pold3 <sup>tm1b(EUCOMM)Wtsi</sup>  |
| 4933434E20Rik <sup>tm1a(EUCOMM)Wtsi</sup> | Fam212b <sup>tm1a(KOMP)Wtsi</sup>    | Polr3f <sup>tm1a(EUCOMM)Wtsi</sup> |
| 5730559C18Rik <sup>tm2a(EUCOMM)Wtsi</sup> | Fam47e <sup>tm1a(EUCOMM)Wtsi</sup>   | Polr3g <sup>tm1a(EUCOMM)Wtsi</sup> |
| 9330182L06Rik <sup>tm1a(KOMP)Wtsi</sup>   | Fam69a <sup>tm1a(EUCOMM)Wtsi</sup>   | Ppil3 <sup>tm1b(EUCOMM)Wtsi</sup>  |
| A430005L14Rik <sup>tm1a(KOMP)Wtsi</sup>   | Fam71b <sup>tm1a(KOMP)Wtsi</sup>     | Prame <sup>tm1a(KOMP)Wtsi</sup>    |
| A430078G23Rik <sup>tm1a(KOMP)Wtsi</sup>   | Fam92a <sup>tm1b(KOMP)Wtsi</sup>     | Prkab1 <sup>tm1b(KOMP)Wtsi</sup>   |
| A730017C20Rik <sup>tm1b(KOMP)Wtsi</sup>   | Fbf1 <sup>tm1a(EUCOMM)Wtsi</sup>     | Prrc2b <sup>tm1a(EUCOMM)Wtsi</sup> |
| Abhd14a <sup>tm2a(EUCOMM)Wtsi</sup>       | Fbxo33 <sup>tm1b(EUCOMM)Wtsi</sup>   | Prrg2 <sup>tm1b(EUCOMM)Wtsi</sup>  |
| Abhd17a <sup>tm1a(KOMP)Wtsi</sup>         | Fbxw26 <sup>tm1b(KOMP)Wtsi</sup>     | Prrt2 <sup>tm1a(KOMP)Wtsi</sup>    |
| Acbd5 <sup>tm1b(EUCOMM)Wtsi</sup>         | Fdft1 <sup>tm1a(KOMP)Wtsi</sup>      | Prss52 <sup>tm2a(KOMP)Wtsi</sup>   |
| Acer1 <sup>tm1a(EUCOMM)Wtsi</sup>         | Fkbp3 <sup>tm2a(EUCOMM)Wtsi</sup>    | Psph <sup>tm1a(EUCOMM)Hmgu</sup>   |
| Actl10 <sup>tm1a(EUCOMM)Wtsi</sup>        | Fnip2 <sup>tm1a(KOMP)Wtsi</sup>      | Pth1r <sup>tm1a(EUCOMM)Hmgu</sup>  |
| Adal <sup>tm1a(EUCOMM)Wtsi</sup>          | Fryl <sup>tm1b(KOMP)Wtsi</sup>       | Pth <sup>tm1a(EUCOMM)Wtsi</sup>    |
| Adamts19 <sup>tm4a(EUCOMM)Wtsi</sup>      | Fxyd3 <sup>tm1a(KOMP)Wtsi</sup>      | Ptprd <sup>tm2a(KOMP)Wtsi</sup>    |

|                                             |                                                |                                             |
|---------------------------------------------|------------------------------------------------|---------------------------------------------|
| <i>Adamts3</i> <sup>tm1b(KOMP)Wtsi</sup>    | <i>Fzd6</i> <sup>tm2a(EUCOMM)Wtsi</sup>        | <i>Pwp1</i> <sup>tm1a(EUCOMM)Wtsi</sup>     |
| <i>Adap1</i> <sup>tm1a(EUCOMM)Wtsi</sup>    | <i>Galnt18</i> <sup>tm1b(KOMP)Wtsi</sup>       | <i>Pycr2</i> <sup>tm1a(EUCOMM)Wtsi</sup>    |
| <i>Adcy2</i> <sup>tm1a(KOMP)Wtsi</sup>      | <i>Galnt15</i> <sup>tm1b(KOMP)Wtsi</sup>       | <i>Rab17</i> <sup>tm1a(KOMP)Wtsi</sup>      |
| <i>Adcy9</i> <sup>tm1b(EUCOMM)Wtsi</sup>    | <i>Gbp5</i> <sup>em1(IMPC)Wtsi</sup>           | <i>Rab21</i> <sup>tm1b(KOMP)Wtsi</sup>      |
| <i>Adgrd1</i> <sup>tm1b(EUCOMM)Wtsi</sup>   | <i>Gda</i> <sup>tm1a(KOMP)Wtsi</sup>           | <i>Raph1</i> <sup>tm1b(EUCOMM)Wtsi</sup>    |
| <i>Adpgk</i> <sup>tm2a(EUCOMM)Wtsi</sup>    | <i>Gdpd2</i> <sup>tm1a(KOMP)Wtsi</sup>         | <i>Rbak</i> <sup>tm1b(KOMP)Wtsi</sup>       |
| <i>Agap1</i> <sup>tm1a(EUCOMM)Wtsi</sup>    | <i>Gimap6</i> <sup>tm1a(KOMP)Wtsi</sup>        | <i>Rbm14</i> <sup>tm1a(KOMP)Wtsi</sup>      |
| <i>Aicda</i> <sup>tm1b(EUCOMM)Hmgu</sup>    | <i>Glo1</i> <sup>tm1a(KOMP)Wtsi</sup>          | <i>Rbm33</i> <sup>tm1b(EUCOMM)Wtsi</sup>    |
| <i>Aldh1b1</i> <sup>tm2a(EUCOMM)Wtsi</sup>  | <i>Glyatl3</i> <sup>em1(IMPC)Wtsi</sup>        | <i>Rbm47</i> <sup>tm1a(EUCOMM)Wtsi</sup>    |
| <i>Aldh3b1</i> <sup>tm1b(EUCOMM)Wtsi</sup>  | <i>Gm12253</i> <sup>tm1a(KOMP)Wtsi</sup>       | <i>Rbmx</i> <sup>tm2b(KOMP)Wtsi</sup>       |
| <i>Alox12e</i> <sup>tm1b(EUCOMM)Wtsi</sup>  | <i>Gm13119</i> <sup>tm2b(KOMP)Wtsi</sup>       | <i>Reg3d</i> <sup>tm1b(EUCOMM)Wtsi</sup>    |
| <i>Alpk1</i> <sup>em1(IMPC)Wtsi</sup>       | <i>Gm13125</i> <sup>tm1b(KOMP)Wtsi</sup>       | <i>Repin1</i> <sup>tm1a(EUCOMM)Wtsi</sup>   |
| <i>Amz2</i> <sup>tm1e(KOMP)Wtsi</sup>       | <i>Gm16432</i> <sup>tm1b(KOMP)Wtsi</sup>       | <i>Rida</i> <sup>tm1a(KOMP)Wtsi</sup>       |
| <i>Ankrd13d</i> <sup>tm1a(KOMP)Wtsi</sup>   | <i>Gm16515</i> <sup>tm1b(EUCOMM)Wtsi</sup>     | <i>Rimbp2</i> <sup>em1(IMPC)Wtsi</sup>      |
| <i>Ankrd6</i> <sup>tm1b(KOMP)Wtsi</sup>     | <i>Gm5544</i> <sup>tm1a(KOMP)Wtsi</sup>        | <i>Rnasek</i> <sup>tm1b(EUCOMM)Wtsi</sup>   |
| <i>Ankrd9</i> <sup>tm1(KOMP)Wtsi</sup>      | <i>Gmds</i> <sup>tm1a(KOMP)Wtsi</sup>          | <i>Rnf10</i> <sup>tm1b(KOMP)Wtsi</sup>      |
| <i>Anks6</i> <sup>tm1b(KOMP)Wtsi</sup>      | <i>Gmnc</i> <sup>tm1b(KOMP)Wtsi</sup>          | <i>Rnf125</i> <sup>tm1a(EUCOMM)Wtsi</sup>   |
| <i>Ano10</i> <sup>tm1a(EUCOMM)Wtsi</sup>    | <i>Gnb3</i> <sup>tm1b(EUCOMM)Wtsi</sup>        | <i>Rnf138</i> <sup>tm1b(EUCOMM)Hmgu</sup>   |
| <i>Anxa9</i> <sup>tm1b(EUCOMM)Wtsi</sup>    | <i>Gppbp1l1</i> <sup>tm1a(EUCOMM)Wtsi</sup>    | <i>Rnf157</i> <sup>tm1b(EUCOMM)Wtsi</sup>   |
| <i>Ap2a2</i> <sup>em1(IMPC)Wtsi</sup>       | <i>Gpr152</i> <sup>tm1b(EUCOMM)Wtsi</sup>      | <i>Rpia</i> <sup>tm1a(KOMP)Wtsi</sup>       |
| <i>Ap4e1</i> <sup>tm1b(KOMP)Wtsi</sup>      | <i>Gpr35</i> <sup>tm1b(EUCOMM)Hmgu</sup>       | <i>Rspo4</i> <sup>tm1a(KOMP)Wtsi</sup>      |
| <i>Ap4m1</i> <sup>tm1b(EUCOMM)Wtsi</sup>    | <i>Grb7</i> <sup>tm1b(EUCOMM)Wtsi</sup>        | <i>Rundc1</i> <sup>tm1b(EUCOMM)Wtsi</sup>   |
| <i>Apip</i> <sup>tm1b(EUCOMM)Wtsi</sup>     | <i>Grsf1</i> <sup>tm1b(EUCOMM)Wtsi</sup>       | <i>Rwdd1</i> <sup>tm1b(KOMP)Wtsi</sup>      |
| <i>Apo19b</i> <sup>tm2a(KOMP)Wtsi</sup>     | <i>Gsdme</i> <sup>tm1b(KOMP)Wtsi</sup>         | <i>Sap130</i> <sup>tm1a(KOMP)Mbp</sup>      |
| <i>Apoo</i> <sup>tm1b(KOMP)Wtsi</sup>       | <i>Gsto2</i> <sup>tm2a(KOMP)Wtsi</sup>         | <i>Scaf11</i> <sup>em1(IMPC)Wtsi</sup>      |
| <i>Arap2</i> <sup>tm2b(EUCOMM)Wtsi</sup>    | <i>Gt(ROSA)26Sor</i> <sup>ROSA26_Dre_C03</sup> | <i>Selenow</i> <sup>tm1b(EUCOMM)Wtsi</sup>  |
| <i>Arhgap17</i> <sup>tm1b(EUCOMM)Wtsi</sup> | <i>Gtf2a1</i> <sup>tm1a(KOMP)Wtsi</sup>        | <i>Sept10</i> <sup>tm1a(KOMP)Wtsi</sup>     |
| <i>Arhgap22</i> <sup>tm1a(KOMP)Wtsi</sup>   | <i>Gtf2h2</i> <sup>tm1a(EUCOMM)Wtsi</sup>      | <i>Serinc3</i> <sup>tm1a(KOMP)Wtsi</sup>    |
| <i>Arhgef1</i> <sup>tm1a(EUCOMM)Wtsi</sup>  | <i>H13</i> <sup>tm1b(KOMP)Wtsi</sup>           | <i>Setd5</i> <sup>tm1a(EUCOMM)Wtsi</sup>    |
| <i>Arid1b</i> <sup>tm1b(EUCOMM)Hmgu</sup>   | <i>Hao2</i> <sup>em1(IMPC)Wtsi</sup>           | <i>Sfxn3</i> <sup>tm1b(KOMP)Wtsi</sup>      |
| <i>Arm7</i> <sup>tm1.1(KOMP)Wtsi</sup>      | <i>Hbs1</i> <sup>tm1a(KOMP)Wtsi</sup>          | <i>Sgms1</i> <sup>tm1a(EUCOMM)Wtsi</sup>    |
| <i>Armh3</i> <sup>tm1a(EUCOMM)Wtsi</sup>    | <i>Hecw2</i> <sup>tm1a(EUCOMM)Wtsi</sup>       | <i>Sgsm1</i> <sup>tm1b(EUCOMM)Wtsi</sup>    |
| <i>Arpc1b</i> <sup>tm1a(EUCOMM)Wtsi</sup>   | <i>Herc1</i> <sup>em1-3(IMPC)Wtsi **</sup>     | <i>Sh3bgrl3</i> <sup>tm2b(EUCOMM)Wtsi</sup> |

|                                                |                                           |                                             |
|------------------------------------------------|-------------------------------------------|---------------------------------------------|
| <i>Arrdc5</i> <sup>tm1b(EUCOMM)Wtsi</sup>      | <i>Hibadh</i> <sup>tm1b(EUCOMM)Wtsi</sup> | <i>Sh3bp4</i> <sup>tm1a(EUCOMM)Wtsi</sup>   |
| <i>Art4</i> <sup>tm1a(KOMP)Wtsi</sup>          | <i>Hmgxb3</i> <sup>tm1a(EUCOMM)Wtsi</sup> | <i>Sh3pxd2a</i> <sup>tm1b(EUCOMM)Wtsi</sup> |
| <i>Atad3a</i> <sup>tm1a(KOMP)Wtsi</sup>        | <i>Homez</i> <sup>tm1e(KOMP)Wtsi</sup>    | <i>Sik3</i> <sup>tm1a(EUCOMM)Hmgu</sup>     |
| <i>Atg16l2</i> <sup>tm1a(EUCOMM)Wtsi</sup>     | <i>Hpf1</i> <sup>em1(IMPC)Wtsi</sup>      | <i>Slamf9</i> <sup>tm1b(EUCOMM)Wtsi</sup>   |
| <i>Atp11a</i> <sup>tm1a(KOMP)Wtsi</sup>        | <i>Hrnr</i> <sup>em1(IMPC)Wtsi</sup>      | <i>Slc16a4</i> <sup>tm2e(EUCOMM)Wtsi</sup>  |
| <i>Atp5e</i> <sup>tm1b(EUCOMM)Wtsi</sup>       | <i>Ifj27</i> <sup>tm1b(EUCOMM)Wtsi</sup>  | <i>Slc25a20</i> <sup>tm1a(EUCOMM)Wtsi</sup> |
| <i>Atp5f1</i> <sup>tm1b(EUCOMM)Wtsi</sup>      | <i>Ifitm6</i> <sup>tm1b(EUCOMM)Wtsi</sup> | <i>Slc25a28</i> <sup>tm1b(EUCOMM)Wtsi</sup> |
| <i>Atp8b2</i> <sup>tm1a(KOMP)Wtsi</sup>        | <i>Ifnar1</i> <sup>tm2a(EUCOMM)Wtsi</sup> | <i>Slc38a2</i> <sup>tm1a(KOMP)Wtsi</sup>    |
| <i>Atxn10</i> <sup>tm1b(KOMP)Wtsi</sup>        | <i>Ifnlr1</i> <sup>tm1a(EUCOMM)Wtsi</sup> | <i>Slc5a7</i> <sup>tm1a(KOMP)Wtsi</sup>     |
| <i>Atxn3</i> <sup>tm1a(KOMP)Wtsi</sup>         | <i>Ift140</i> <sup>tm1a(KOMP)Wtsi</sup>   | <i>Slc9a3r2</i> <sup>tm2a(EUCOMM)Hmgu</sup> |
| <i>Bach2</i> <sup>tm1a(EUCOMM)Wtsi</sup>       | <i>Il1r2</i> <sup>tm1a(EUCOMM)Wtsi</sup>  | <i>Slitrk4</i> <sup>tm1b(KOMP)Wtsi</sup>    |
| <i>Bai1</i> <sup>tm2a(EUCOMM)Wtsi</sup>        | <i>Il23r</i> <sup>tm2a(EUCOMM)Wtsi</sup>  | <i>Slu7</i> <sup>tm1a(KOMP)Wtsi</sup>       |
| <i>Bap1</i> <sup>tm1a(EUCOMM)Hmgu</sup>        | <i>Il27</i> <sup>tm1b(EUCOMM)Wtsi</sup>   | <i>Slx4ip</i> <sup>tm1a(EUCOMM)Wtsi</sup>   |
| <i>Barhl1</i> <sup>tm1(EGFP_CreERT2)Wtsi</sup> | <i>Irak1</i> <sup>tm1b(EUCOMM)Hmgu</sup>  | <i>Smg9</i> <sup>tm1b(EUCOMM)Wtsi</sup>     |
| <i>Bivm</i> <sup>tm1b(KOMP)Wtsi</sup>          | <i>Irf5</i> <sup>tm1e(EUCOMM)Wtsi</sup>   | <i>Smpd4</i> <sup>tm2b(KOMP)Wtsi</sup>      |
| <i>Bnip2</i> <sup>tm1b(EUCOMM)Wtsi</sup>       | <i>Izumo1r</i> <sup>tm2a(KOMP)Wtsi</sup>  | <i>Snx31</i> <sup>tm1a(KOMP)Wtsi</sup>      |
| <i>Bpgm</i> <sup>tm1a(KOMP)Wtsi</sup>          | <i>Josd1</i> <sup>em1(IMPC)Wtsi</sup>     | <i>Snx8</i> <sup>tm2a(EUCOMM)Hmgu</sup>     |
| <i>Bpifb1</i> <sup>tm1e(KOMP)Wtsi</sup>        | <i>Kat2b</i> <sup>em1(IMPC)Wtsi</sup>     | <i>Spata25</i> <sup>tm1(KOMP)Wtsi</sup>     |
| <i>Bpifb5</i> <sup>tm2a(KOMP)Wtsi</sup>        | <i>Kcnh4</i> <sup>tm1b(KOMP)Wtsi</sup>    | <i>Spink14</i> <sup>tm1e(KOMP)Wtsi</sup>    |
| <i>Brd2</i> <sup>em1(IMPC)Wtsi</sup>           | <i>Kera</i> <sup>em1(IMPC)Wtsi</sup>      | <i>Sqle</i> <sup>tm1a(EUCOMM)Wtsi</sup>     |
| <i>Camkmt</i> <sup>tm1b(EUCOMM)Wtsi</sup>      | <i>Kif13b</i> <sup>tm1b(EUCOMM)Wtsi</sup> | <i>Srsf7</i> <sup>tm1a(EUCOMM)Wtsi</sup>    |
| <i>Camsap3</i> <sup>tm1a(EUCOMM)Wtsi</sup>     | <i>Kif18b</i> <sup>tm1a(EUCOMM)Wtsi</sup> | <i>Ssr2</i> <sup>tm1b(EUCOMM)Wtsi</sup>     |
| <i>Capn11</i> <sup>tm1b(EUCOMM)Wtsi</sup>      | <i>Kif1bp</i> <sup>tm1a(KOMP)Wtsi</sup>   | <i>Stard8</i> <sup>tm1b(EUCOMM)Wtsi</sup>   |
| <i>Capza2</i> <sup>tm1b(KOMP)Wtsi</sup>        | <i>Kif24</i> <sup>tm1b(KOMP)Wtsi</sup>    | <i>Stau2</i> <sup>tm1a(EUCOMM)Wtsi</sup>    |
| <i>Card9</i> <sup>tm1a(EUCOMM)Hmgu</sup>       | <i>Kif3b</i> <sup>tm1b(EUCOMM)Wtsi</sup>  | <i>Stxbp4</i> <sup>tm1a(EUCOMM)Wtsi</sup>   |
| <i>Casc4</i> <sup>tm2b(EUCOMM)Wtsi</sup>       | <i>Klc2</i> <sup>tm1e(EUCOMM)Wtsi</sup>   | <i>Sult1c1</i> <sup>tm1b(KOMP)Wtsi</sup>    |
| <i>Catip</i> <sup>tm1b(KOMP)Wtsi</sup>         | <i>Klf17</i> <sup>tm1b(KOMP)Wtsi</sup>    | <i>Supt3</i> <sup>tm1a(EUCOMM)Hmgu</sup>    |
| <i>Cbr2</i> <sup>tm1b(EUCOMM)Hmgu</sup>        | <i>Klhl18</i> <sup>tm1a(KOMP)Wtsi</sup>   | <i>Supt5</i> <sup>tm2a(KOMP)Wtsi</sup>      |
| <i>Ccdc127</i> <sup>tm1b(EUCOMM)Wtsi</sup>     | <i>Klhl30</i> <sup>tm1a(KOMP)Wtsi</sup>   | <i>Tbc1d22a</i> <sup>tm1b(KOMP)Wtsi</sup>   |
| <i>Ccdc159</i> <sup>tm1a(KOMP)Wtsi</sup>       | <i>Klk5</i> <sup>tm2a(KOMP)Wtsi</sup>     | <i>Tceal5</i> <sup>tm1b(KOMP)Wtsi</sup>     |
| <i>Ccdc18</i> <sup>tm1a(EUCOMM)Wtsi</sup>      | <i>Klk6</i> <sup>em1(IMPC)Wtsi</sup>      | <i>Tcf7l2</i> <sup>tm1a(EUCOMM)Wtsi</sup>   |
| <i>Ccdc69</i> <sup>tm1b(KOMP)Wtsi</sup>        | <i>Klrb1a</i> <sup>tm1a(KOMP)Wtsi</sup>   | <i>Tchp</i> <sup>tm1a(EUCOMM)Wtsi</sup>     |
| <i>Ccdc6</i> <sup>em1(IMPC)Wtsi</sup>          | <i>Krt31</i> <sup>tm1e(KOMP)Wtsi</sup>    | <i>Tcp11</i> <sup>tm1a(EUCOMM)Wtsi</sup>    |

|                                              |                                            |                                             |
|----------------------------------------------|--------------------------------------------|---------------------------------------------|
| <i>Cdkn2aipn1</i> <sup>tm1b(KOMP)Wtsi</sup>  | <i>Krt7</i> <sup>tm1b(KOMP)Wtsi</sup>      | <i>Tctex1d2</i> <sup>tm1e(EUCOMM)Wtsi</sup> |
| <i>Celf4</i> <sup>tm1a(EUCOMM)Wtsi</sup>     | <i>Krt83</i> <sup>tm1b(KOMP)Wtsi</sup>     | <i>Tead3</i> <sup>tm1a(EUCOMM)Wtsi</sup>    |
| <i>Cenpl</i> <sup>tm1b(EUCOMM)Wtsi</sup>     | <i>L3mbtl2</i> <sup>tm2a(EUCOMM)Wtsi</sup> | <i>Tent5c</i> <sup>tm1b(KOMP)Wtsi</sup>     |
| <i>Cep250</i> <sup>tm1a(EUCOMM)Wtsi</sup>    | <i>Lars</i> <sup>tm1b(KOMP)Wtsi</sup>      | <i>Tet1</i> <sup>tm1a(KOMP)Wtsi</sup>       |
| <i>Cfap53</i> <sup>em1(IMPC)Wtsi</sup>       | <i>Lce1m</i> <sup>tm1b(EUCOMM)Wtsi</sup>   | <i>Tex38</i> <sup>tm1a(KOMP)Wtsi</sup>      |
| <i>Cfap61</i> <sup>tm2a(EUCOMM)Wtsi</sup>    | <i>Lce3c</i> <sup>tm2a(EUCOMM)Wtsi</sup>   | <i>Tgfb1i1</i> <sup>tm1b(KOMP)Wtsi</sup>    |
| <i>Cgrrf1</i> <sup>tm1b(KOMP)Wtsi ****</sup> | <i>Ldhb</i> <sup>tm1b(KOMP)Wtsi</sup>      | <i>Tgm6</i> <sup>tm1a(KOMP)Wtsi</sup>       |
| <i>Chd9</i> <sup>tm1a(EUCOMM)Wtsi</sup>      | <i>Ldlrad4</i> <sup>tm1b(EUCOMM)Wtsi</sup> | <i>Timeless</i> <sup>tm1b(EUCOMM)Hmgu</sup> |
| <i>Chil4</i> <sup>tm1b(EUCOMM)Hmgu</sup>     | <i>Leo1</i> <sup>tm1a(EUCOMM)Wtsi</sup>    | <i>Timmdc1</i> <sup>tm1b(EUCOMM)Wtsi</sup>  |
| <i>Chmp6</i> <sup>tm1b(KOMP)Wtsi</sup>       | <i>Leprot</i> <sup>tm2b(KOMP)Wtsi</sup>    | <i>Tmc3</i> <sup>tm2b(KOMP)Wtsi</sup>       |
| <i>Chst11</i> <sup>tm1a(KOMP)Wtsi</sup>      | <i>Lmna</i> <sup>G609G ***</sup>           | <i>Tmem110</i> <sup>tm2b(KOMP)Wtsi</sup>    |
| <i>Chtop</i> <sup>tm1a(EUCOMM)Wtsi</sup>     | <i>Lonrf3</i> <sup>tm1b(KOMP)Wtsi</sup>    | <i>Tmem126a</i> <sup>tm1a(EUCOMM)Wtsi</sup> |
| <i>Cir1</i> <sup>tm3a(KOMP)Wtsi</sup>        | <i>Lpxn</i> <sup>tm1b(EUCOMM)Hmgu</sup>    | <i>Tmem127</i> <sup>tm1(KOMP)Wtsi</sup>     |
| <i>Clpp</i> <sup>tm1a(EUCOMM)Wtsi</sup>      | <i>Lrmp</i> <sup>tm1b(EUCOMM)Wtsi</sup>    | <i>Tmem18</i> <sup>tm1b(EUCOMM)Wtsi</sup>   |
| <i>(Cluster5N1)</i> <sup>(tm1)Brd *</sup>    | <i>Lrrc23</i> <sup>tm1a(EUCOMM)Wtsi</sup>  | <i>Tmem241</i> <sup>tm1b(EUCOMM)Wtsi</sup>  |
| <i>(ClusterXN1)</i> <sup>tm1(Brd) *</sup>    | <i>Lrrc71</i> <sup>tm1a(KOMP)Wtsi</sup>    | <i>Tmem254b</i> <sup>tm1a(KOMP)Wtsi</sup>   |
| <i>Cmb1</i> <sup>tm1b(KOMP)Wtsi</sup>        | <i>Lrrc8d</i> <sup>tm1a(EUCOMM)Wtsi</sup>  | <i>Tmem30a</i> <sup>tm1a(KOMP)Wtsi</sup>    |
| <i>Cmtm5</i> <sup>tm1a(KOMP)Wtsi</sup>       | <i>Lyp1a1</i> <sup>tm1a(KOMP)Wtsi</sup>    | <i>Tmem37</i> <sup>tm1a(EUCOMM)Wtsi</sup>   |
| <i>Cnbd1</i> <sup>tm1b(EUCOMM)Wtsi</sup>     | <i>Lyrn9</i> <sup>tm1a(KOMP)Mbp</sup>      | <i>Tmem42</i> <sup>tm1b(KOMP)Wtsi</sup>     |
| <i>Cnot4</i> <sup>tm1b(EUCOMM)Wtsi</sup>     | <i>Macrodl</i> <sup>em1(IMPC)Wtsi</sup>    | <i>Tomm20l</i> <sup>tm1b(EUCOMM)Wtsi</sup>  |
| <i>Cog6</i> <sup>tm1a(EUCOMM)Wtsi</sup>      | <i>Mamstr</i> <sup>tm1b(EUCOMM)Wtsi</sup>  | <i>Traf2</i> <sup>tm1a(EUCOMM)Wtsi</sup>    |
| <i>Col24a1</i> <sup>tm1b(EUCOMM)Wtsi</sup>   | <i>Mast2</i> <sup>tm1a(KOMP)Wtsi</sup>     | <i>Traf6</i> <sup>tm2a(EUCOMM)Wtsi</sup>    |
| <i>Col4a3bp</i> <sup>tm1a(KOMP)Wtsi</sup>    | <i>Mau2</i> <sup>tm1b(KOMP)Wtsi</sup>      | <i>Trappc10</i> <sup>tm1b(KOMP)Wtsi</sup>   |
| <i>Coro6</i> <sup>tm1e(EUCOMM)Wtsi</sup>     | <i>Mbd1</i> <sup>em1(IMPC)Wtsi</sup>       | <i>Trappc9</i> <sup>tm1a(EUCOMM)Wtsi</sup>  |
| <i>Cpgi81</i> <sup>tm1.1(NCC)WCS *</sup>     | <i>Mbl2</i> <sup>em1(IMPC)Wtsi</sup>       | <i>Trem1</i> <sup>tm1(KOMP)Vlcg</sup>       |
| <i>Cpsf3</i> <sup>tm1b(EUCOMM)Wtsi</sup>     | <i>Mcf2l</i> <sup>tm1a(EUCOMM)Hmgu</sup>   | <i>Trim21</i> <sup>em1(IMPC)Wtsi</sup>      |
| <i>Cpt2</i> <sup>tm1b(KOMP)Wtsi</sup>        | <i>Med22</i> <sup>tm1a(EUCOMM)Wtsi</sup>   | <i>Trim25</i> <sup>tm2b(EUCOMM)Hmgu</sup>   |
| <i>Crim1</i> <sup>em1(IMPC)Wtsi</sup>        | <i>Med23</i> <sup>em1(IMPC)Wtsi</sup>      | <i>Trim56</i> <sup>tm1a(EUCOMM)Wtsi</sup>   |
| <i>Crlf3</i> <sup>em1(IMPC)Wtsi</sup>        | <i>Medag</i> <sup>tm2b(KOMP)Wtsi</sup>     | <i>Trim65</i> <sup>tm1b(KOMP)Wtsi</sup>     |
| <i>Crls1</i> <sup>tm1a(EUCOMM)Wtsi</sup>     | <i>Metrln</i> <sup>tm1b(KOMP)Wtsi</sup>    | <i>Trmt2a</i> <sup>tm2b(EUCOMM)Wtsi</sup>   |
| <i>Csmd1</i> <sup>em1(IMPC)Wtsi</sup>        | <i>Mettl24</i> <sup>tm1a(KOMP)Wtsi</sup>   | <i>Trp53rkb</i> <sup>tm1a(EUCOMM)Wtsi</sup> |
| <i>Csnk1g3</i> <sup>tm1a(EUCOMM)Wtsi</sup>   | <i>Mgat4c</i> <sup>tm1a(EUCOMM)Wtsi</sup>  | <i>Trub2</i> <sup>tm2a(EUCOMM)Wtsi</sup>    |
| <i>Ctr9</i> <sup>tm1b(EUCOMM)Wtsi</sup>      | <i>Mir32</i> <sup>(tm1)Brd</sup>           | <i>Tuba3a</i> <sup>tm1b(KOMP)Wtsi</sup>     |

|                                                  |                                                        |                                           |
|--------------------------------------------------|--------------------------------------------------------|-------------------------------------------|
| <i>Cttnbp2</i> <sup>tm1b(KOMP)Wtsi</sup>         | <i>Mir96</i> <sup>tm2.2(IMPC)Wtsi</sup>                | <i>Tuft1</i> <sup>tm1a(KOMP)Wtsi</sup>    |
| <i>Cutal</i> <sup>tm1a(EUCOMM)Wtsi</sup>         | <i>Mir122</i> <sup>(tm1)Brd</sup>                      | <i>Ube2d1</i> <sup>tm3e(EUCOMM)Wtsi</sup> |
| <i>Cxcr1</i> <sup>tm1a(EUCOMM)Wtsi</sup>         | <i>Mir210</i> <sup>(tm1)Brd</sup>                      | <i>Ubxn10</i> <sup>tm1b(EUCOMM)Wtsi</sup> |
| <i>Cxcr2</i> <sup>tm1a(EUCOMM)Wtsi</sup>         | <i>Mir211</i> <sup>(tm1)Brd</sup>                      | <i>Uevld</i> <sup>tm1a(EUCOMM)Wtsi</sup>  |
| <i>Cyp2b13</i> <sup>tm1b(KOMP)Wtsi</sup>         | <i>Mir342</i> <sup>(tm1)Brd</sup>                      | <i>Umodl1</i> <sup>tm1a(KOMP)Wtsi</sup>   |
| <i>Cyp2r1</i> <sup>tm1b(EUCOMM)Wtsi</sup>        | <i>Mkrn2</i> <sup>tm1b(KOMP)Wtsi/em1(IMPC)Wtsi**</sup> | <i>Uri1</i> <sup>tm1a(EUCOMM)Wtsi</sup>   |
| <i>D630023F18Rik</i> <sup>tm1b(KOMP)Wtsi</sup>   | <i>Mospd1</i> <sup>tm1a(KOMP)Wtsi</sup>                | <i>Usp11</i> <sup>tm1(KOMP)Wtsi</sup>     |
| <i>D6Wsu163e</i> <sup>tm1b(EUCOMM)Wtsi</sup>     | <i>Mpg</i> <sup>tm1a(EUCOMM)Wtsi</sup>                 | <i>Usp20</i> <sup>tm1a(EUCOMM)Hmgu</sup>  |
| <i>D7Ert443e</i> <sup>tm2a(KOMP)Wtsi</sup>       | <i>Mrm1</i> <sup>tm2a(EUCOMM)Wtsi</sup>                | <i>Usp30</i> <sup>tm2b(EUCOMM)Hmgu</sup>  |
| <i>D930028M14Rik</i> <sup>tm1a(EUCOMM)Wtsi</sup> | <i>Mroh4</i> <sup>tm1b(KOMP)Wtsi</sup>                 | <i>Usp37</i> <sup>em1(IMPC)Wtsi</sup>     |
| <i>Dact3</i> <sup>tm1b(KOMP)Wtsi</sup>           | <i>Mroh9</i> <sup>tm1a(EUCOMM)Wtsi</sup>               | <i>Usp5</i> <sup>tm1a(EUCOMM)Hmgu</sup>   |
| <i>Daf2</i> <sup>tm1a(KOMP)Wtsi</sup>            | <i>Mrps21</i> <sup>tm1e(EUCOMM)Wtsi</sup>              | <i>Vamp3</i> <sup>tm2b(EUCOMM)Wtsi</sup>  |
| <i>Dap</i> <sup>tm1a(KOMP)Mbp</sup>              | <i>Mrps5</i> <sup>tm1b(EUCOMM)Wtsi</sup>               | <i>Vps13a</i> <sup>tm1b(EUCOMM)Wtsi</sup> |
| <i>Dapk2</i> <sup>tm1b(EUCOMM)Wtsi</sup>         | <i>Mybph1</i> <sup>tm1b(KOMP)Wtsi</sup>                | <i>Vps33b</i> <sup>tm1a(EUCOMM)Wtsi</sup> |
| <i>Dbn1</i> <sup>tm1b(KOMP)Wtsi</sup>            | <i>Myh7b</i> <sup>tm1a(KOMP)Wtsi</sup>                 | <i>Vps51</i> <sup>tm1a(KOMP)Wtsi</sup>    |
| <i>Dcaf11</i> <sup>tm1a(KOMP)Wtsi</sup>          | <i>Myo10</i> <sup>tm2(KOMP)Wtsi</sup>                  | <i>Vps72</i> <sup>tm1a(EUCOMM)Wtsi</sup>  |
| <i>Dcbld2</i> <sup>tm1a(KOMP)Wtsi</sup>          | <i>Myo9a</i> <sup>tm1b(EUCOMM)Wtsi</sup>               | <i>Vwa3a</i> <sup>tm1b(KOMP)Wtsi</sup>    |
| <i>Dcdc2b</i> <sup>tm1b(KOMP)Wtsi</sup>          | <i>N6amt2</i> <sup>tm1a(EUCOMM)Wtsi</sup>              | <i>Wac</i> <sup>tm1b(EUCOMM)Wtsi</sup>    |
| <i>Dclk1</i> <sup>tm1a(EUCOMM)Wtsi</sup>         | <i>Nacc2</i> <sup>tm2b(EUCOMM)Wtsi</sup>               | <i>Washc2</i> <sup>tm2b(KOMP)Wtsi</sup>   |
| <i>Dcn</i> <sup>em1(IMPC)Wtsi</sup>              | <i>Nadk2</i> <sup>tm1b(EUCOMM)Wtsi</sup>               | <i>Wdr89</i> <sup>tm1a(KOMP)Wtsi</sup>    |
| <i>Dctn4</i> <sup>em1(IMPC)Wtsi</sup>            | <i>Nat10</i> <sup>tm1a(KOMP)Wtsi</sup>                 | <i>Wdtdc1</i> <sup>tm1a(KOMP)Wtsi</sup>   |
| <i>Ddah1</i> <sup>tm2a(EUCOMM)Wtsi</sup>         | <i>Ncf2</i> <sup>tm1a(EUCOMM)Wtsi</sup>                | <i>Wnt16</i> <sup>tm2b(EUCOMM)Wtsi</sup>  |
| <i>Ddx42</i> <sup>tm1b(EUCOMM)Wtsi</sup>         | <i>Ndufb8</i> <sup>tm1a(EUCOMM)Wtsi</sup>              | <i>Wrap53</i> <sup>tm1b(EUCOMM)Wtsi</sup> |
| <i>Ddx51</i> <sup>tm1a(KOMP)Wtsi</sup>           | <i>Nebi</i> <sup>tm1b(EUCOMM)Wtsi</sup>                | <i>Xkrx</i> <sup>tm1b(EUCOMM)Wtsi</sup>   |
| <i>Defb14</i> <sup>tm1b(KOMP)Wtsi</sup>          | <i>Nek3</i> <sup>tm1b(EUCOMM)Wtsi</sup>                | <i>Xpnpep1</i> <sup>tm1a(KOMP)Wtsi</sup>  |
| <i>Defb22</i> <sup>tm1a(KOMP)Wtsi</sup>          | <i>Nek9</i> <sup>tm1a(EUCOMM)Wtsi</sup>                | <i>Xxylt1</i> <sup>tm1a(EUCOMM)Hmgu</sup> |
| <i>Defb30</i> <sup>tm2b(KOMP)Wtsi</sup>          | <i>Nelfe</i> <sup>tm1a(EUCOMM)Wtsi</sup>               | <i>Ydjc</i> <sup>tm1(KOMP)Wtsi</sup>      |
| <i>Dennd1b</i> <sup>tm1a(EUCOMM)Hmgu</sup>       | <i>Nfkbil1</i> <sup>tm1a(KOMP)Wtsi</sup>               | <i>Yipf7</i> <sup>tm1e(KOMP)Wtsi</sup>    |
| <i>Dennd1c</i> <sup>tm1b(EUCOMM)Wtsi</sup>       | <i>Nhlrc2</i> <sup>tm1a(KOMP)Wtsi</sup>                | <i>Ypel4</i> <sup>tm1a(EUCOMM)Wtsi</sup>  |
| <i>Dennd4c</i> <sup>tm1b(EUCOMM)Wtsi</sup>       | <i>Nipsnap3a</i> <sup>tm1b(KOMP)Wtsi</sup>             | <i>Zbed5</i> <sup>tm1b(EUCOMM)Wtsi</sup>  |
| <i>Denr</i> <sup>tm1b(KOMP)Wtsi</sup>            | <i>Nme4</i> <sup>tm1a(EUCOMM)Wtsi</sup>                | <i>Zfp182</i> <sup>tm1b(KOMP)Wtsi</sup>   |
| <i>Dffb</i> <sup>em1(IMPC)Wtsi</sup>             | <i>Nmrk1</i> <sup>tm1a(KOMP)Wtsi</sup>                 | <i>Zfp239</i> <sup>tm1b(KOMP)Wtsi</sup>   |
| <i>Dhodh</i> <sup>tm1b(EUCOMM)Wtsi</sup>         | <i>Npat</i> <sup>tm1b(EUCOMM)Wtsi</sup>                | <i>Zfp266</i> <sup>tm1b(EUCOMM)Wtsi</sup> |



|                                            |                                           |                                            |
|--------------------------------------------|-------------------------------------------|--------------------------------------------|
| <i>Dhps</i> <sup>tm2a(EUCOMM)Wtsi</sup>    | <i>Nrbp1</i> <sup>tm3b(EUCOMM)Wtsi</sup>  | <i>Zfp287</i> <sup>tm1b(EUCOMM)Wtsi</sup>  |
| <i>Dhx33</i> <sup>tm1b(KOMP)Wtsi</sup>     | <i>Nrde2</i> <sup>tm2a(KOMP)Wtsi</sup>    | <i>Zfp341</i> <sup>tm1a(KOMP)Wtsi</sup>    |
| <i>Dhx35</i> <sup>tm1b(EUCOMM)Wtsi</sup>   | <i>Nudt12</i> <sup>tm1a(KOMP)Wtsi</sup>   | <i>Zfp365</i> <sup>tm1a(KOMP)Wtsi</sup>    |
| <i>Dip2a</i> <sup>tm2b(KOMP)Wtsi</sup>     | <i>Nup85</i> <sup>tm1a(KOMP)Wtsi</sup>    | <i>Zfp408</i> <sup>tm1b(EUCOMM)Wtsi</sup>  |
| <i>Dlg3</i> <sup>tm1a(EUCOMM)Wtsi</sup>    | <i>Nutm2</i> <sup>tm2b(EUCOMM)Wtsi</sup>  | <i>Zfp616</i> <sup>tm1b(KOMP)Wtsi</sup>    |
| <i>Dlg4</i> <sup>tm1e(EUCOMM)Wtsi</sup>    | <i>Nxn</i> <sup>tm1b(EUCOMM)Wtsi</sup>    | <i>Zfp658</i> <sup>tm1b(EUCOMM)Wtsi</sup>  |
| <i>Dlk1</i> <sup>em1(IMPC)Wtsi</sup>       | <i>Oaf</i> <sup>tm1a(EUCOMM)Wtsi</sup>    | <i>Zfp719</i> <sup>tm1a(EUCOMM)Wtsi</sup>  |
| <i>Dmgdh</i> <sup>tm1a(KOMP)Wtsi</sup>     | <i>Oog2</i> <sup>tm1a(EUCOMM)Wtsi</sup>   | <i>Zfp719</i> <sup>tm1b(EUCOMM)Wtsi</sup>  |
| <i>Dnah17</i> <sup>tm1e(KOMP)Wtsi</sup>    | <i>Orc1</i> <sup>tm1a(KOMP)Wtsi</sup>     | <i>Zfp763</i> <sup>em1(IMPC)Wtsi</sup>     |
| <i>Dnajc8</i> <sup>tm1b(KOMP)Wtsi</sup>    | <i>Os9</i> <sup>tm1a(EUCOMM)Wtsi</sup>    | <i>Zfp791</i> <sup>tm1a(KOMP)Wtsi</sup>    |
| <i>Dnase1l2</i> <sup>tm1.1(KOMP)Wtsi</sup> | <i>Osbp13</i> <sup>tm1a(EUCOMM)Wtsi</sup> | <i>Zfp84</i> <sup>tm1b(KOMP)Wtsi</sup>     |
| <i>Dnmt3a</i> <sup>tm1a(KOMP)Wtsi</sup>    | <i>Otud7b</i> <sup>tm1b(EUCOMM)Wtsi</sup> | <i>Zfp879</i> <sup>tm2b(KOMP)Wtsi</sup>    |
| <i>Dnpep</i> <sup>tm1e(EUCOMM)Wtsi</sup>   | <i>Pam16</i> <sup>tm1b(EUCOMM)Wtsi</sup>  | <i>Zfyve28</i> <sup>tm1b(EUCOMM)Wtsi</sup> |
| <i>Dph6</i> <sup>tm1a(KOMP)Wtsi</sup>      | <i>Pced1a</i> <sup>tm1b(EUCOMM)Wtsi</sup> | <i>Zranb1</i> <sup>tm1a(EUCOMM)Hmgu</sup>  |
| <i>Dpm1</i> <sup>tm1b(KOMP)Wtsi</sup>      |                                           |                                            |

\* Knockouts of multi-gene or regulatory regions:

**Cluster 5N1:** mmu-mir-25 (ENSMUSG00000065394), mmu-mir-93 (ENSMUSG00000065527), mmu-mir-106b (ENSMUSG00000065514)

**ClusterXN1:** ENSMUSG00000070106, ENSMUSG00000065613 ENSMUSG00000065473, ENSMUSG00000076041 ENSMUSG00000077111, ENSMUSG00000065456

**Cpgi81:** CpG island 81, Chr1:23255875-23257106 bp

\*\* More than one mouse line has been phenotyped for these genes.

\*\*\* The *Lmna* allele is not an IMPC allele and has been described previously<sup>62</sup>.

\*\*\*\* The *Cgrrf1* ko strain has a mixed C57BL/6N; C57BL/6NTac background.

**Supplementary Table 5: Key resources**

| REAGENT or RESOURCE                             | SOURCE           | IDENTIFIER                     |
|-------------------------------------------------|------------------|--------------------------------|
| Antibodies                                      |                  |                                |
| CD3ε Functional grade purified, clone eBio500A2 | eBioscience      | 16-0033-86;<br>RRID: AB_842782 |
| CD3ε BV421, clone 145-2C11                      | BD Biosciences   | 562600                         |
| CD3ε BV785, clone 145-2C11                      | BioLegend UK Ltd | 100232                         |
| CD4 PE, clone RM4-5                             | BioLegend UK Ltd | 00511;<br>RRID: AB_312714      |
| CD4 BV510, clone RM4-5                          | BioLegend UK Ltd | 100553 RRID:AB_2561388         |
| CD4 BV786, clone RM4-5                          | BD Biosciences   | 563331                         |
| CD5 APC, clone 53-7.3                           | BD Biosciences   | 550035                         |
| CD5 BV510, clone 53-7.3                         | BD Biosciences   | 563069                         |
| CD8a APC, clone 53-6.7                          | BioLegend UK Ltd | 100712;<br>RRID: AB_312750     |
| CD8α AF700, clone 53-6.7                        | BD Biosciences   | 557959                         |
| CD8α APC-H7, clone 53-6.7                       | BD Biosciences   | 560182 RRID:AB_1645237         |
| CD11b BV510, clone M1/70                        | BioLegend UK Ltd | 101245                         |
| CD11b PE-Cy7, clone M1/70                       | BioLegend UK Ltd | 101216 RRID:AB_312799          |
| CD11c BV786, clone HL3                          | BD Biosciences   | 563735                         |
| CD19 BV421, clone ID3                           | BD Biosciences   | 562701                         |
| CD19 PE-CF594, clone ID3                        | BD Biosciences   | 562291 RRID:AB_11154223        |
| CD19 PECY7, clone ID3                           | BD Biosciences   | 552854                         |
| CD21/35 FITC, clone 7G6                         | BD Biosciences   | 553818                         |
| CD21/35 PE, clone 7G6                           | BD Biosciences   | 552957                         |
| CD23 BV421, clone B3B4                          | BD Biosciences   | 562929                         |
| CD24 APC, clone M1/69                           | BD Biosciences   | 562349                         |
| CD25 APC, clone PC61                            | BD Biosciences   | 557192                         |
| CD25 PE, clone PC61                             | BioLegend UK Ltd | 102008 RRID:AB_312857          |
| CD28 Functional grade purified, clone 37.51     | eBioscience      | 16-0281-86;RRID:<br>AB_468923  |
| CD43 PerCP-Cy5.5                                | BioLegend UK Ltd | 121224                         |
| CD44 FITC, clone 1B11                           | BD Biosciences   | 553133                         |
| CD44 FITC, clone IM7                            | BD Biosciences   | 561859 RRID:AB_10894581        |
| CD45 Alexa 700, clone 30-F11                    | BioLegend UK Ltd | 103128 RRID:AB_493715          |
| CD45 e450, clone 30-F11                         | eBioscience      | 48-0451-82                     |
| CD45 eVolve™ 605 (Qdot), clone 30-F11           | eBioscience      | 83-0451-42                     |
| CD45 eFluor450, clone 30-F11                    | eBioscience      | 48-0451-82                     |
| CD45R (B220) PeCY7, clone RA3-6B2               | BioLegend UK Ltd | 103222                         |

|                                            |                  |                         |
|--------------------------------------------|------------------|-------------------------|
| CD45R (B220) AF700, clone RA3-6B2          | BD Biosciences   | 557957                  |
| CD62L PE-CF594, clone MEL-14               | BD Biosciences   | 562404 RRID:AB_11154046 |
| CD62L PerCP Cy5.5, clone MEL-14            | BD Biosciences   | 560513                  |
| CD86 PECY7, clone GL1                      | BD Biosciences   | 560582                  |
| CD95 PECY7, clone Jo2                      | BD Biosciences   | 557653                  |
| CD103 PE, M290                             | BD Biosciences   | 557495                  |
| CD115 APC, clone AF598                     | BioLegend UK Ltd | 135510 RRID:AB_2085221  |
| CD138 BV650, clone 281-2                   | BioLegend UK Ltd | 142517                  |
| CD161 (NK1.1) BV421, clone PK136           | BioLegend UK Ltd | 108732 RRID:AB_2562218  |
| CD161 (NK1.1) BV650, clone PK136           | BioLegend UK Ltd | 108736                  |
| CD317 BV650, clone 927                     | BioLegend UK Ltd | 127019                  |
| F4/80 PerCP-Cy5.5, clone BM8               | BioLegend UK Ltd | 123128                  |
| Fc block                                   | BD Biosciences   | 553142                  |
| GITR PE, clone DTA-1                       | BD Biosciences   | 558119                  |
| GL-7 AF647, clone GL7                      | BD Biosciences   | 561529                  |
| Gr-1 AF700, clone RB6-8C5                  | BioLegend UK Ltd | 108422                  |
| Ig HRP, polyclonal                         | Dako             | P0447                   |
| IgG (H+L) FITC, polyclonal                 | Invitrogen       | 626511                  |
| IgG1 HRP, clone X56                        | BD Biosciences   | 559626                  |
| IgG2a HRP, clone R19-15                    | BD Biosciences   | 553391                  |
| IgD BV510, clone 11-26c.2a                 | BD Biosciences   | 563110                  |
| IgD PerCP-Cy5.5, clone 11-26c.2a           | BioLegend UK Ltd | 405710                  |
| IgD AF488, clone 11-26c.2a                 | BioLegend UK Ltd | 405718                  |
| IgG1 PE, clone A85-1                       | BD Biosciences   | 550083                  |
| IgM BV42, clone RMM-1                      | BioLegend UK Ltd | 406518                  |
| IgM BV786, clone R6-60.2                   | BD Biosciences   | 564028                  |
| KLRG1 BV421, clone 2F1                     | BD Biosciences   | 562897                  |
| KLRG1 PE-Cy7, clone 2F1                    | BioLegend UK Ltd | 138416 RRID:AB_2561736  |
| Ly-51 PE, clone BP-1                       | BD Biosciences   | 553735                  |
| Ly6B FITC, clone 7/4                       | AbD Serotec      | MCA771FB RRID:AB_324596 |
| Ly6C AF700, clone AL-21                    | BD Biosciences   | 561237                  |
| Ly6C PerCP-Cy5.5, clone HK1.4              | BioLegend UK Ltd | 128012 RRID:AB_1659241  |
| Ly6G APC, clone 1A8                        | BD Biosciences   | 560599                  |
| Ly6G V450, clone 1A8                       | BD Biosciences   | 560603 RRID:AB_1727564  |
| MHC II I-A/I-E PE, clone M5/114.15.2       | BioLegend UK Ltd | 107608 RRID:AB_313323   |
| MHC II I-A/I-E AF647,<br>clone M5/114.15.2 | BioLegend UK Ltd | 107618                  |
| MHC II I-A/I-E FITC, 2G9                   | BD Biosciences   | 553623                  |
| MHC II I-A/I-E AF647,<br>clone M5/114.15.2 | BioLegend UK Ltd | 107618                  |

|                                                          |                                |                        |
|----------------------------------------------------------|--------------------------------|------------------------|
| V $\gamma$ 5 (aka V $\gamma$ 3) FITC, clone 536          | BD Biosciences                 | 553229                 |
| TCR $\beta$ PerCP-Cy5.5, clone H57-597                   | BioLegend UK Ltd               | 109228 RRID:AB_1575173 |
| TCR $\delta$ PE CY7, clone GL3                           | BioLegend UK Ltd               | 118124                 |
| TCR $\delta$ APC, clone GL3                              | BioLegend UK Ltd               | 118116 RRID:AB_1731813 |
|                                                          |                                |                        |
| Chemicals, Peptides, and Recombinant Proteins            |                                |                        |
| 10mM HEPES                                               | Life Signalling Technologies   | 15630056               |
| Collagenase                                              | Sigma Aldrich - Roche          | 11088858001            |
| DNAase                                                   | Sigma                          | DN25                   |
| RBC lysis buffer                                         | eBioscience                    | 00-4300-54             |
| EDTA (0.5 M), pH 8.0                                     | Life Technologies              | AM9261                 |
| Prolong Gold Mounting Medium                             | New England Biolabs            | 9071S                  |
| Zombie NIR Fixable Viability Kit                         | Biolegend                      | 423106                 |
| BD FACSDiva CS&T Research Beads                          | BD Biosciences                 | 655051                 |
| Ammonium thiocyanate                                     | Sigma                          | A7149-100G             |
| Nair <sup>TM</sup> moisturizing hair removal cream       | Church & Dwight Co.            | N/A                    |
| Acetone                                                  | VWR                            | 20067-320              |
| Fetal Bovine Serum                                       | Gibco                          | FBS                    |
| Fetal Bovine Serum                                       | Hyclone laboratories - Biosera | FB-1001/500            |
| RPMI 1640                                                | GIBCO - life technologies      | 21875034               |
| RPMI 1640 (no phenol red)                                | GIBCO - life technologies      | 32404014               |
| PBS 10x (neg for CA <sup>2+</sup> and Mg <sup>2+</sup> ) | Gibco                          | 14200-067              |
| PBS 10x (with calcium & Magnesium)                       | Gibco                          | 14080-048              |
| PBS, D'Beccos                                            | GIBCO - life technologies      | 14190094               |
| D-MEM (HG)                                               | GIBCO - life technologies      | 41966029               |
| DPBS                                                     | Sigma-Aldrich                  | D8662                  |
| Water                                                    | Sigma-Aldrich                  | W3500                  |
| Mounting Medium Dropper Vial 5mL                         | A. Menarini Diagnostics Ltd.   | 38015                  |
| 2-mercaptoethanol                                        | GIBCO Invitrogen               | 31350010               |
| L-Glutamine                                              | GIBCO Invitrogen               | 25030024               |

|                                                          |                                                 |                                                                      |
|----------------------------------------------------------|-------------------------------------------------|----------------------------------------------------------------------|
| Recombinant murine IL-2                                  | Peprotech                                       | 212-12-100                                                           |
| Penicillin/Streptomycin                                  | Sigma-Aldrich                                   | P4333                                                                |
| Sodium Pyruvate MEM                                      | Sigma-Aldrich                                   | 11360039                                                             |
| Dextran sulfate, sodium salt                             | Affymetrix, Inc.                                | 14489; CAS# 9011-18-1                                                |
| Formaldehyde 4% solution                                 | VWR international<br>Ltd                        | 9713.5000                                                            |
| BSA                                                      | Sigma-Aldrich                                   | A9056                                                                |
| Sigmafast                                                | Sigma-Aldrich                                   | P9187                                                                |
| LB                                                       | Oxoid                                           | CM1018                                                               |
| Ampicillin                                               | Roche                                           | 10 835 242 001                                                       |
| Tween 20                                                 | Sigma-Aldrich                                   | P1379                                                                |
| Critical Commercial Assays                               |                                                 |                                                                      |
| Zenit ANA HEp-2 Cells (12 wells)                         | A. Menarini<br>Diagnostics Ltd.                 | 37806                                                                |
| FITC – QC Slide                                          | A. Menarini<br>Diagnostics Ltd.                 | 38015                                                                |
| Cytotox 96 non-radioactive assay                         | Promega UK Ltd                                  | G1780                                                                |
| Deposited Data                                           |                                                 |                                                                      |
| 3i statistical analysis                                  | This study                                      | <a href="http://www.immunophenotype.org">www.immunophenotype.org</a> |
| Raw and analyzed data                                    | This study                                      | <a href="http://www.immunophenotype.org">www.immunophenotype.org</a> |
| Experimental Models: Cell Lines                          |                                                 |                                                                      |
| P815 mastocytoma cell line                               | ATTC                                            | TIB-64                                                               |
| HEp-2 cell lines, coated on slides                       | A. Menarini<br>Diagnostics Ltd.                 | 37806                                                                |
| Experimental Models: Organisms/Strains                   |                                                 |                                                                      |
| C57BL/6N wild type control mice                          | WTSI                                            |                                                                      |
| Knockout mouse strains as detailed in<br><b>Table S4</b> | WTSI                                            |                                                                      |
| <i>Salmonella typhimurium</i> M525 :: TetC               | Gordon Dougan,<br>WTSI                          |                                                                      |
| <i>Trichuris muris</i>                                   | Richard Grencis,<br>University of<br>Manchester |                                                                      |
| Equipment                                                |                                                 |                                                                      |

|                                                                                                                     |                                         |                                                                                                                                                                                                                                                 |
|---------------------------------------------------------------------------------------------------------------------|-----------------------------------------|-------------------------------------------------------------------------------------------------------------------------------------------------------------------------------------------------------------------------------------------------|
| Scil Vetabc hematology analyser                                                                                     | Horiba                                  | <a href="http://www.horiba.com/uk/medical/products/animal-healthcare/haematology/scil-vet-abc-details/scil-vet-abc-12687/">http://www.horiba.com/uk/medical/products/animal-healthcare/haematology/scil-vet-abc-details/scil-vet-abc-12687/</a> |
| BD LSR II flow cytometer (Blood)                                                                                    | BD Biosciences                          | RRID:SCR_002159;<br><a href="http://www.rockefeller.edu/fcrc/pdf/BD_LSRII_Brochure_SJ-0142-00.pdf">http://www.rockefeller.edu/fcrc/pdf/BD_LSRII_Brochure_SJ-0142-00.pdf</a>                                                                     |
| BD LSR Fortessa X-20 (Spleen, MLN, and bone marrow)                                                                 | BD Biosciences                          | <a href="http://www.bdbiosciences.com/us/instruments/research/cell-analyzers/bd-lsrfortessa-x-20/m/1519232/overview">http://www.bdbiosciences.com/us/instruments/research/cell-analyzers/bd-lsrfortessa-x-20/m/1519232/overview</a>             |
| Leica SP2 confocal microscopes, 40x 1.25 NA oil immersion lens and 405 nm, 488 nm and 633 nm lasers (Ear epidermis) | Leica                                   | <a href="https://www.leica-microsystems.com/products/confocal-microscopes/details/product/leica-tcs-sp2/">https://www.leica-microsystems.com/products/confocal-microscopes/details/product/leica-tcs-sp2/</a>                                   |
| Leica SP5 confocal microscopes, 40x 1.25 NA oil immersion lens and 405 nm, 488 nm and 633 nm lasers (ear epidermis) | Leica                                   | <a href="https://www.leica-microsystems.com/products/confocal-microscopes/details/product/leica-tcs-sp5/">https://www.leica-microsystems.com/products/confocal-microscopes/details/product/leica-tcs-sp5/</a>                                   |
| <b>Nikon wide-field TE2000U Microscope (ANA)</b>                                                                    | Nikon                                   | TE2000U                                                                                                                                                                                                                                         |
| Deltavision Elite widefield system based on an Olympus microscope, LED light source and CoolSNAP HQ2 camera (ANA)   | GE Healthcare Life Sciences, Olympus    | <a href="https://www.gelifesciences.com/en/us/shop/deltavision-elite-high-resolution-microscope-p-04420">https://www.gelifesciences.com/en/us/shop/deltavision-elite-high-resolution-microscope-p-04420</a>                                     |
| Zeiss AxioPlan Microscope with a Plan Neofluar 5x/0.15 Ph1 objective and Moti Cam 10 camera (DSS)                   | Zeiss                                   | <a href="https://www.zeiss.com/microscopy/int/home.html?gclid=EAlaIQobChMIj7KRv-mH4QIVybHtChOC3w_OEAA YASAAEgJ2afD_BwE">https://www.zeiss.com/microscopy/int/home.html?gclid=EAlaIQobChMIj7KRv-mH4QIVybHtChOC3w_OEAA YASAAEgJ2afD_BwE</a>       |
| <b>Software and Algorithms</b>                                                                                      |                                         |                                                                                                                                                                                                                                                 |
| R version 3.3.1 -3.5.2 and general data analysis packages (data.table, ggplot2, dplyr, igraph, MASS)                | The R project for statistical computing | <a href="http://www.r-project.org">www.r-project.org</a>                                                                                                                                                                                        |

|                                                                            |                   |                                                                                                                                 |
|----------------------------------------------------------------------------|-------------------|---------------------------------------------------------------------------------------------------------------------------------|
| PhenStat_2.8<br>org.Hs.eg.db<br>org.Mm.eg.db                               | BioConductor      | www.bioconductor.org                                                                                                            |
| RStudio 1.0.136                                                            | RStudio           | https://www.rstudio.com                                                                                                         |
| R code for reference range analysis,<br>assessment of false positive rate  | Anna Lorenc       | <a href="https://github.com/AnnaLorenc/3i_heatmapping">https://github.com/AnnaLorenc/3i_heatmapping</a><br>available on request |
| Flow Jo v1.10                                                              | Treestar          | RRID:SCR_008520;<br>http://www.flowjo.com                                                                                       |
| Cytoscape 3.6.1                                                            | Cytoscape         | www.cytoscape.org                                                                                                               |
| BD DIVA 7.0                                                                | BD Biosciences    | RRID:SCR_001456;<br>http://www.bdbiosciences.com/instruments/software/facsdiva/index.jsp                                        |
| flowClean                                                                  | Ryan Brinkman     | Fletez-Brant et al 2016                                                                                                         |
| UFO                                                                        | Ryan Brinkman     | available on request                                                                                                            |
| flowDensity                                                                | Ryan Brinkman     | Malek et al 2015                                                                                                                |
| PRISM 6                                                                    | Graphpad software | http://www.graphpad.com/scientific-software/prism/                                                                              |
| Definiens developer                                                        | Definiens         | www.definiens.com                                                                                                               |
| ANA assay Fiji/ImageJ macro                                                | Katherine Bull    | www.immunophenotype.org                                                                                                         |
| ANA assay Python scoring script                                            | Katherine Bull    | www.immunophenotype.org                                                                                                         |
| Microsoft Excel 2010                                                       | Microsoft         | https://www.microsoftstore.com/store/msuk/en_GB/home                                                                            |
| Deposited Data                                                             |                   |                                                                                                                                 |
| 3i statistical analysis                                                    | This study        | www.immunophenotype.org                                                                                                         |
| Raw and analyzed data                                                      | This study        | www.immunophenotype.org                                                                                                         |
| Other                                                                      |                   |                                                                                                                                 |
| 30 µm CellTrics filters                                                    | Partec Cell Trics | 04-0042-2316                                                                                                                    |
| 96 Well Clear V-Bottom Not Treated<br>Polypropylene Microplate, Nonsterile | SLS               | 353263                                                                                                                          |
| Microtube MaxyClear PP clear 1.7 mL<br>(Axygen)                            | Fisher            | 12756799                                                                                                                        |
| C-Tubes                                                                    | Miltenyi Biotec   | 130-096-334                                                                                                                     |
| Superfrost R Plus #72, 26x76x1 mm (75<br>pieces)                           | VWR               | 631-0108                                                                                                                        |
| Cover Glass 22 x 40 Mm No. 1,5                                             | VWR               | 631-1370                                                                                                                        |
